**Title:**

Loss-of-function mutation in *IKZF2* leads to immunodeficiency with dysregulated germinal center reactions and reduction of MAIT cells

**One sentence summary:**

Truncating variant of HELIOS causes immunodeficiency with signs of immune overactivation.

**Authors:**

Iivo Hetemäki<sup>1</sup>, Meri Kaustio<sup>2\*</sup>, Matias Kinnunen<sup>3\*</sup>, Nelli Heikkilä<sup>1</sup>, Salla Keskitalo<sup>3</sup>, Simo Miettinen<sup>1</sup>, Joonas Sarkkinen<sup>1</sup>, Virpi Glumoff<sup>4</sup>, Noora Andersson<sup>5</sup>, Kaisa Kettunen<sup>2,6</sup>, Reetta Vanhanen<sup>1</sup>, Katariina Nurmi<sup>1</sup>, Kari K Eklund<sup>1,7,8</sup>, Johannes Dunkel<sup>5</sup>, Mikko Mäyränpää<sup>5</sup>, Heinrich Schlums<sup>9</sup>, T. Petteri Arstila<sup>1</sup>, Kai Kisand<sup>10</sup>, Yenan T. Bryceson<sup>9,11</sup>, Pärt Peterson<sup>10</sup>, Ulla Otava<sup>12</sup>, Jaana Syrjänen<sup>12</sup>, Janna Saarela<sup>2,13\*</sup>, Markku Varjosalo<sup>3\*</sup>, Eliisa Kekäläinen<sup>1</sup>

\*Equal contribution

**Affiliations:**

1) Translational Immunology Research Program, University of Helsinki, and Helsinki University Hospital, Helsinki, Finland

- 2) Institute for Molecular Medicine Finland (FIMM), HiLIFE, University of Helsinki, Helsinki, Finland
- 3) Institute of Biotechnology, HiLIFE Helsinki Institute of Life Science, University of Helsinki, Helsinki, Finland
- 4) Research unit of Biomedicine, University of Oulu, Oulu Finland
- 5) Department of Pathology, University of Helsinki and Helsinki University Central Hospital, Helsinki, Finland
- 6) Department of Genetics, University of Helsinki and Helsinki University Hospital, Helsinki, Finland
- 7) Department of Rheumatology, University of Helsinki and Helsinki University Central Hospital, Helsinki, Finland
- 8) Orton Orthopaedic Hospital of the Orton Foundation, Helsinki, Finland
- 9) Center for Hematology and Regenerative Medicine, Department of Medicine, Karolinska Institutet, Stockholm, Sweden.
- 10) Institute of Biomedicine and Translational Medicine, University of Tartu, Tartu, Estonia
- 11) Broegelmann Research Laboratory, Department of Clinical Sciences, University of Bergen, Bergen, Norway.
- 12) Infectious Disease Unit, Department of Internal Medicine, Tampere University Hospital, Tampere, Finland
- 13) Centre for Molecular Medicine Norway (NCMM), University of Oslo, Oslo, Norway

**Corresponding Author:**

Eliisa Kekäläinen

e-mail: [eliisa.kekalainen@helsinki.fi](mailto:eliisa.kekalainen@helsinki.fi)

telephone: +358 50 472 2580

1 **Abstract:**

2

3 The IKAROS family transcription factors regulate lymphocyte development. Loss-of-function  
4 variants in *IKZF1* cause primary immunodeficiency, but IKAROS family members *IKZF2* and *IKZF3*  
5 have not yet been associated with immunodeficiency yet. Here, we describe a pedigree with a  
6 heterozygous truncating variant in *IKZF2*, encoding the translational activator and repressor  
7 HELIOS which is highly expressed in regulatory T cells and effector T cells, particularly of the CD8<sup>+</sup>  
8 T cell lineage. Protein-protein interaction analysis revealed that the variant abolished HELIOS  
9 dimerizations as well as binding to members of the Mi-2/NuRD chromatin remodeling complex.  
10 Patients carrying the *IKZF2* variant presented with a combined immunodeficiency phenotype  
11 characterized by recurrent upper respiratory infections, thrush and mucosal ulcers, as well as  
12 chronic lymphadenopathy. With extensive immunophenotyping, functional assays, and  
13 transcriptional analysis we show that reduced HELIOS expression was associated with chronic T  
14 cell activation and increased production of pro-inflammatory cytokines both in effector and  
15 regulatory T cells. Lymph node histology from patients indicated dysregulated germinal center  
16 reactions. Moreover, affected individuals displayed profoundly reduced circulating MAIT cell  
17 numbers. In summary, we show that this novel loss-of-function variant in HELIOS leads to an  
18 immunodeficiency with signs of immune overactivation.

19 **Main Text:**

20

21 **Introduction**

22

23 The *IKZF2* gene encodes for the zinc-finger protein HELIOS that can act both as an activator and  
24 repressor of transcription. HELIOS is a member of the IKAROS family of transcription factors,  
25 which all share the same structure of two Krüppel-like zinc-finger domains. The N-terminal  
26 domain of the protein is required for DNA binding and the C-terminal domain mediates homo-  
27 as well as hetero- dimerization with other IKAROS family members, IKAROS and AIOLOS (1).  
28 IKAROS family members have a wide role on the development and function of the immune  
29 system. They appear to function through orchestrating chromatin remodeling, in which their  
30 interactions with the nucleosome remodeling and histone deacetylase (NuRD) complex, one of  
31 the major transcriptional corepressor complexes in mammalian cells, are essential (2–4). Both  
32 IKAROS and HELIOS are proto-oncogenes for hematological malignancies - IKAROS in acute  
33 lymphoblastic leukemia and HELIOS in T cell leukemias and acute myeloid leukemia (4–6).  
34 Heterozygous variants in the *IKZF1* gene causing haploinsufficiency of IKAROS have been recently  
35 shown to cause common variable immunodeficiency -like syndrome with variable clinical  
36 phenotypes (7), while dominant negative mutations are associated with T, B, and myeloid cell  
37 combined immunodeficiency (8).

38

39 Helios expression is mostly limited to the T cell lineage but young *Ikzf2* knockout mice show no  
40 clear immunological phenotype even though a large fraction of homozygous pups perishes for

41 unknown reasons before weaning(9). Older *Ikzf2*<sup>-/-</sup> mice develop an autoimmune phenotype  
42 characterized by autoantibodies and dysregulated germinal center reactions (10, 11). Helios is  
43 highly expressed in both murine and human T regulatory cells (Tregs) and therefore most studies  
44 have focused on its role in peripheral immune tolerance. Helios stabilizes the non-inflammatory  
45 phenotype of Tregs, possibly via STAT-5 mediated signaling and prevents IL-2 production in Tregs  
46 by epigenetic silencing (12). In selective knock-out models and human memory Tregs, Helios-  
47 negative Tregs produce more proinflammatory cytokines than their Helios-expressing  
48 counterparts (13, 14). However, the suppressive capacity of Tregs is not severely impaired in  
49 Helios<sup>-/-</sup> mice (11).

50

51 In addition to the constitutively high expression of HELIOS in Tregs, the expression is also induced  
52 after TCR-mediated activation in both Tregs and effector T cells (15, 16). Other factors controlling  
53 the expression are unknown, but involvement of NFkappaB transcription factor has been  
54 suggested (17). Studies on T cell exhaustion with LCMV murine infection model identified Helios  
55 as one of the most important transcription factors differentiating exhausted virus specific T cells  
56 from naive and memory cells (18, 19). It is thus evident that HELIOS has a significant role in  
57 regulating effector T cell activity during immune responses.

58

59 Thus far no germline *IKZF2* variants have been described in humans with a primary  
60 immunodeficiency disease (PID). Here we describe a heterozygous *IKZF2* loss-of-function variant  
61 in a single family, causing an immunodeficiency with increased immune activation and profound  
62 reduction of Mucosal associated invariant T (MAIT) cells. Affected patients have

63 lymphadenopathy with dysregulated germinal centers and aberrations in antibody production  
64 reminiscent of the Helios knock-out mouse phenotype. Our results emphasize the importance of  
65 the HELIOS' protein binding domains in mediating its functions in both effector and regulatory T  
66 cells.

## 67 Results

68

### 69 A novel *IKZF2* variant associated with symptoms of immunodeficiency and immune 70 dysregulation

71 The index patient, a female in her late 30's, (patient 1) was referred to our immunodeficiency clinic  
72 due to chronic vulvovaginal *Candida albicans* infection, recurrent vulvar and oral mucosal aphtae,  
73 chronic lymphadenopathy, and recurrent upper respiratory infections (Table 1). In initial  
74 examinations she was diagnosed with hypogammaglobulinemia and is now receiving  
75 immunoglobulin replacement therapy. Her relative, a male in his 60's, (patient 2) has suffered  
76 from recurrent pneumonias, lichen planus, and oral thrush. He was diagnosed with Hodgkin's  
77 lymphoma at his 30s and also had chronic lymphadenopathy without lymphoma relapse. More  
78 detailed case reports are provided by the authors upon reasonable request.

79 We performed whole exome sequencing (WES) for patients 1 and 2 but found no known  
80 PID-causing variants. Analysis of WES data filtered for rare variants shared by both patients (Suppl  
81 Table 1) identified a previously unreported heterozygous variant in *IKZF2* (chr2:213886829 G>T,  
82 NM\_016260: c.C600A, p.Y200X) that introduces a premature stop-codon in the sequence coding  
83 for the fourth DNA-binding zinc-finger of HELIOS (Figure 1A). Targeted capillary sequencing  
84 validated the variant in the two patients and found all other tested relatives homozygous for the  
85 reference allele. The combined annotation-dependent depletion (CADD) score for this variant  
86 was 38, which is well above the mutation significance cutoff of 3.313 for *IKZF2* (Kircher et al 2014;  
87 Itan et al 2016). The position of this novel variant is highly evolutionary conserved (conservation  
88 score of 5.8, calculated using GERP++ (20)) further supporting that the variant is damaging.



89 Targeted capillary sequencing of the patient RNA derived cDNA indicated that the transcript  
90 containing the premature stop codon is not eliminated by the nonsense mediated RNA decay and  
91 may produce a truncated protein product (Supple Fig 1A). Based on these observations and  
92 previously reported functions of HELIOS in lymphocytes, we considered the *IKZF2* c.C600A,  
93 p.Y200X (here on p.Y200X for short) variant the most plausible candidate for further studies.

94 We evaluated the expression of HELIOS in patients and healthy controls by flow  
95 cytometry. HELIOS mean fluorescent intensity was considerably lower in patients in both CD4<sup>+</sup>  
96 and CD8<sup>+</sup> T cells compared with both healthy controls and unaffected relatives (Figure 1B, Suppl  
97 Fig 1C). Since IKAROS family members are known to form functional heterodimers between each  
98 other (3), we also quantified the expression of AIOLOS and IKAROS in patients. Mean expression  
99 of AIOLOS was higher in patients in total CD4<sup>+</sup> helper T cells when compared with healthy  
100 controls. However, this difference was explained by a larger fraction of mature AIOLOS<sup>high</sup> CD4<sup>+</sup>  
101 T cells in patients (Suppl Fig 1D). No difference in IKAROS expression were detected (Figure 1C,  
102 Suppl Fig 1E). In summary, the novel *IKZF2* variant resulted in diminished HELIOS expression in  
103 affected individuals with no differences in expression levels of other IKAROS family members.

104

#### 105 **Truncating variant abolishes HELIOS interactions with Mi-2/NuRD complex components**

106 Since the variants premature stop-codon prevented the translation from the second zinc-finger  
107 domain onwards, we reasoned that it most likely affects the variant's protein-protein  
108 interactions. In order to determine possible changes in interactions we performed biotin  
109 proximity ligation (BioID, (21)) in generated stable cell lines, expressing HELIOS constructs with  
110 MAC tag (Liu et al.) The variant p.Y200X lost protein-protein interaction with 48 proteins

111 compared with wild-type HELIOS. Furthermore, interaction with 187 protein partners was  
112 significantly reduced compared to the wild-type HELIOS (Fig 1D and Suppl Table 2). Considering  
113 the central role of IKAROS family members as part of the Mi-2/NuRD complex (22), we specifically  
114 looked for altered interactions in this protein complex. The truncated HELIOS variant had reduced  
115 or lost interaction with 12 proteins involved in the Mi-2/NuRD complex, including Mi-2alpha and  
116 CHD3 that both are essential in the formation of the Mi-2/NuRD complex (23).

117         Since IKAROS family members heterodimerize strongly with each other, we tested if the  
118 variant p.Y200X affected HELIOS' dimerization with IKAROS and AIOLOS. In a co-  
119 immunoprecipitation assay the variant's dimerization with both AIOLOS and IKAROS was  
120 markedly impaired compared to the wild-type HELIOS (Fig 1E).

121         We used the ClueGo clustering tool (24) to identify the biological processes that were  
122 affected by variant's lost protein-protein interactions. The proteins with altered interaction with  
123 the truncated HELIOS had functions predominantly linked to DNA modulation and transcription  
124 (ClueGO\_MF, Suppl Table 2), and transcriptional repressors (ClueGO\_BP, Fig 1F, Suppl Table 2).  
125 The interactome analysis thus indicated that the patient-derived *IKZF2* truncating variant  
126 impaired key HELIOS protein-protein interactions, including heterodimerization with AIOLOS and  
127 IKAROS.

128

### 129 **Increased T cell differentiation and augmented proinflammatory proteins in patients with the** 130 ***IKZF2* p.Y200X variant**

131 Immunophenotyping of T lymphocytes in the patients showed a decreased proportion of naïve  
132 CD8<sup>+</sup> T cells with concomitant expansion of memory subsets. Especially the proportion of

133 CD45RA<sup>+</sup>CCR7<sup>-</sup> T effector memory RA<sup>+</sup> (TEMRA) cells was higher in patients (Table 1). In CD4<sup>+</sup> cells  
134 similar, though less pronounced, bias towards memory phenotype was observed. Patients also  
135 had increased number of activated CD38<sup>+</sup>HLADR<sup>+</sup> cells *ex vivo* in both CD4<sup>+</sup> and CD8<sup>+</sup> T cell subsets  
136 (Table 1). In a more detailed flow cytometry immunophenotyping we could detect a skewing  
137 from naive T cells to effector memory - like phenotype that is also associated with T cell  
138 senescence (Fig 2A). Compared with healthy controls and non-affected relatives, a shift from  
139 naïve T cells to terminally differentiated effector memory cells was detected (Fig 2B). In all, the  
140 patients' immunophenotype indicated chronic activation and increased maturation of T cells.

141 In order to decipher the origin of the chronic activation in patients' T cells, we used a  
142 custom gene panel (50 genes linked to immune signaling and inflammasome activation) with  
143 Nanostring nCounter (25) to screen for gene expression profiles in the patients' peripheral blood  
144 mononuclear (PBMC) cells *ex vivo*. Both patients had a marked upregulation of genes related to  
145 both type 1 and type 2 interferon, NFkB, and JAK-STAT signaling (Fig 2C). Also a number of genes  
146 associated with inflammasome signaling were upregulated.

147 Cytotoxic CD8<sup>+</sup> T cells had the highest HELIOS expression of effector T cell populations  
148 analyzed (Suppl Fig 2C&D) so we decided to do RNA sequencing (RNASeq) on magnetic bead  
149 enriched CD8<sup>+</sup> T cells from patients and age and sex matched healthy controls to confirm and  
150 expand these findings from the Nanostring assay. In differential expression analysis using EdgeR  
151 several immunoregulatory and functional genes had altered expression in patients, such as  
152 upregulation of SMAD7 and downregulation of CD101 (Suppl Table 3). Pathway analysis using IPA  
153 showed that IFNgamma and IL1b downstream signaling pathways were markedly upregulated in  
154 patients (z-score 2.304, p=1x10<sup>-7</sup> and Z-score 2.543 and P=6x10<sup>-7</sup> respectively, Suppl Table 4).

155           RNASeq showed that expression of genes S100A8 and S100A9 were upregulated in  
156 patients' CD8 positive T cells *ex vivo* when compared with age and sex matched healthy controls  
157 (Fig 2D, Suppl Table 3). These genes code for a heterodimer called calprotectin that is a strong  
158 proinflammatory alarmin molecule. Calprotectin can be used as a biomarker for disease activity  
159 in many inflammatory conditions (26). To confirm the RNASeq result indicating increased  
160 calprotectin production, we measured the total calprotectin level from patients' sera. Patient 1  
161 had 6.58 mg/l and patient 2 11.49 mg/l of total calprotectin in their serum, i.e. 1.2 and 2.1 times  
162 higher than the upper limit of reference values generated from healthy donors (27). The non-  
163 affected relatives had normal levels of calprotectin (1.95 and 3.72 mg/l).

164           Gene expression analysis of patients' PBMCs revealed upregulation of genes relating to  
165 inflammasome activation. Calprotectin can activate inflammasome through TLR4 and induce il-  
166 1 $\beta$  production from target cells ((28)). We measured the serum levels of il-1 $\beta$  and found  
167 elevated concentrations from both patients: 1,95 pg/ml for patient 1 and 0,59 pg/ml for patient  
168 2. All healthy controls were below the detection level of 0,31 pg/ml (n=21). Analysis of culture  
169 media of unstimulated PBMCs also revealed increased spontaneous secretion of il-1 $\beta$  for  
170 patients, although less pronounced for patient 2 (Fig 2E). However, no clear differences in  
171 inflammasome activation or cellular death were detected in comparison with healthy controls  
172 when patients' monocytes were activated with LPS and combination of LPS and ATP (Suppl Fig  
173 3A-C).

174           These data indicate that the patients with the heterozygous p.Y200X variant, display a  
175 proinflammatory transcriptional signature both in their PBMCs and cytotoxic T cells. The

176 increased proinflammatory milieu was also reflected by elevated serum levels of potent  
177 proinflammatory proteins.

178

### 179 **Increased IFN $\gamma$ and IL-2 signaling in T cells from patients with the *IKZF2* p.Y200X variant**

180 Both the maturation status of lymphocytes and ex vivo gene expression pointed to increased  
181 inflammatory signaling, so we proceeded to measure if the T cell receptor mediated activation  
182 was affected in patients. HELIOS is upregulated in response to TCR activation and currently there  
183 are no other known signaling pathways that control HELIOS expression (15). When we did a CD3-  
184 CD28 co-stimulation with immobilized activating antibodies on PBMCs *in vitro*, healthy controls  
185 showed a marked upregulation of HELIOS, especially in CD8<sup>+</sup> T cells. However, with the same *in*  
186 *vitro* stimulation, our patients failed to upregulate HELIOS (Fig 3A).

187         Since TCR stimulation exacerbated HELIOS deficiency, we performed RNASeq on purified  
188 T cells from patients or age-sex matched healthy controls after 24 hr stimulation with  
189 immobilized anti-CD3-CD28 antibodies. We analyzed differential gene expression between  
190 patients and healthy controls in both unactivated and anti-CD3/CD28 activated CD3<sup>+</sup> cells.  
191 Whereas only 10 genes were differentially expressed in the unactivated state (Suppl Fig 4E &  
192 Suppl Table 3), 103 genes showed differential expression after TCR activation including 16  
193 downregulated and 87 upregulated genes (Suppl Fig 4F & Suppl Table 3). Analysis of sample pairs  
194 from the same individuals prior and after anti-CD3/CD28 activation also allowed us to compare  
195 transcriptional changes between groups in response to activation. As expected, a large  
196 percentage of expressed genes in CD3 cells were up- or downregulated in response to TCR  
197 activation (Suppl Fig 4G). To visualize the correlation in transcriptional regulation between

198 patients and healthy controls, we plotted the gene-wise log<sub>2</sub> fold changes of each group against  
199 each other (Fig 3B). Pearson's correlation coefficient between patients and controls was 0.8,  
200 showing that by-and-large both groups exhibit similar up- and downregulation of gene expression  
201 in response to TCR activation. The genes differentially upregulated or downregulated in patients  
202 versus controls in the anti-CD3/CD28 treated cells are marked in red and blue, respectively. This  
203 illustrates that most of the differentially upregulated genes either retain higher expression or are  
204 upregulated more after TCR activation in patients than in controls.

205 In pathway analysis of differentially expressed genes after CD3-CD28 activation both IFN $\gamma$   
206 and IL-2 downstream signaling was upregulated in patients (z-score 2,129, p-value  $8 \times 10^{-10}$  and  
207 z-score 3,875, p-value  $8 \times 10^{-13}$ , respectively; Suppl Table 4). Also the T cell exhaustion  
208 transcriptional signature (z-score 0,813, p-value  $1 \times 10^{-4}$ ) and NF $\kappa$ B signaling pathway (z-score  
209 1,342, p-value 0,005) were upregulated compared with healthy controls. When we cross-  
210 analyzed the protein partners whose interaction with the variant HELIOS was affected, we could  
211 detect changes in downstream signaling of several of HELIOS' protein partners (Suppl Table 4).  
212 Taken together, the transcriptional landscape after TCR stimulation in patients with the p.Y200X  
213 variant of IKZF2 compared with healthy controls indicated immune dysregulation of several  
214 major immune activation pathways.

215 Both Nanostring analysis on PBMCs and RNASeq T cells *ex vivo* and after stimulation  
216 suggested increased IFN $\gamma$  signaling. Another important pro-inflammatory cytokine controlled by  
217 Helios is IL-2 (12) so we analyzed the IFN $\gamma$  and IL-2 production in T cells after TCR stimulation.  
218 Increased proportion of IFN $\gamma$  - and IL-2 - producing cells was observed in patients in response to  
219 TCR stimulation (Fig 3C&D). IL-2 receptor alpha chain (CD25) expression levels were lower *ex vivo*

220 in patients compared to controls (Fig 3E). Low CD25 could result from downregulation of the IL-  
221 2 receptor in response to higher baseline level of IL-2. We also measured the soluble CD25 from  
222 patients' sera and it was within reference values (Suppl Clinical data). The kinetics of activation  
223 marker expression after TCR stimulation on both CD4 and CD8 effector T cells were comparable  
224 between patients and healthy controls indicating that reduced HELIOS expression does not affect  
225 the overall expression of activation markers on T cells (Fig 3F&G). One patient had significantly  
226 reduced proliferative response of both CD4<sup>+</sup> and CD8<sup>+</sup> T cells to TCR stimulation as measured by  
227 both CFSE assay and failed upregulation of Ki67 (Fig 3F&G).

228 To summarize, reduced expression of HELIOS in T cells is associated with altered response  
229 to TCR stimulation. More specifically, we could detect increased production and downstream  
230 signaling of proinflammatory cytokines in effector T cells.

231

232 **Patients with the *IKZF2* p.Y200X variant have an increased proportion of T regulatory cells with**  
233 **a proinflammatory phenotype but normal suppressive activity**

234 Helios expression is high in Tregs and it stabilizes Treg suppressive function in mice (10) so we  
235 next measured if the Tregs from patients also produced more proinflammatory cytokines similar  
236 to what has been reported in Helios-deficient mice (12). In our patients, the proportion of  
237 circulating naive and activated Tregs was lower than in healthy controls or unaffected relatives  
238 (Fig 4A). More detailed characterization of Tregs revealed a shift from naive Tregs to more mature  
239 phenotype in patients as in T cells in general. Proportion of recent thymic emigrant Tregs was  
240 also lower in patients (Fig 4B). However, the suppressive function of Tregs *in vitro* was not  
241 affected in suppression assay (Fig 4C). This apparent discrepancy could be partly explained by the

242 high expression level of immunosuppressive protein receptor CTLA-4 and suppressive adenosine  
243 producing ectonucleotidase CD39 (Fig 4D). Patients' Tregs were thus more mature and activated  
244 as compared with healthy controls which could in part compensate for the reduced numbers.

245 *In vitro* Treg suppression assays have several limitations and do not reflect all functional  
246 aspects of Tregs so we continued to do a transcriptome analysis of Tregs. We sorted CD127<sup>+</sup>  
247 CD25<sup>hi</sup> T cells from patients and age and sex matched healthy controls (Suppl Fig 5C). The changes  
248 in transcriptome were less pronounced than in effector T cells. Treg analysis was somewhat  
249 limited by the low number of Treg cells and RNA yield. As in effector T cells the IFN $\gamma$  and NF $\kappa$ B  
250 signaling were higher in patients (z-score 2,271, p-value  $9 \times 10^{-9}$ , and z-score 1,623, p-value  
251  $2 \times 10^{-4}$ , respectively). These most likely reflect the overall proinflammatory milieu in the  
252 patients. However, some Treg-specific changes could be seen. For example the paraprotein  
253 convertase Furin expression was higher in patient Tregs (Fig 4F). Furin has been reported to be  
254 important for the suppressive capacity of Tregs and it is upregulated in the activated Tregs (29,  
255 30). Together, Furin, CD39, and CTLA-4 upregulation indicate that patients' Tregs were more  
256 activated than in healthy controls (Suppl Fig 5B).

257 Helios-deficiency in mice has been reported to lead to proinflammatory cytokine  
258 production in Tregs mice (10), so we proceeded to test how fresh Tregs isolated from our patients  
259 responded to stimulus. After *in vitro* TCR stimulation the patients' Tregs had a higher proportion  
260 of IL-2 producing Treg cells but there was no clear difference for IFN $\gamma$  production (Fig 4E). Since  
261 diminished IL-2-STAT5 signaling has been linked to Treg instability in Helios<sup>-/-</sup> mice (10) we also  
262 evaluated STAT5 phosphorylation in response to IL-2 stimulation. No differences were observed  
263 (Suppl Fig 5D). These data indicate that Tregs in patients with heterozygous loss-of-function



264 variant in *IKZF2* are skewed towards a more activated and mature phenotype. These Tregs retain  
265 their suppressive capacity but also produce more IL-2.

266

267 **Dysregulated germinal center reactions and aberrant antibody production in patients with the**  
268 ***IKZF2* p. Y200X variant**

269 Both patients' clinical presentation with recurrent upper and lower respiratory infections  
270 suggested common variable immunodeficiency - like B cell pathology. Clinical immunophenotype  
271 of the B cells revealed an increased proportion of transitional B cells in both patients. Patient 1  
272 also had a higher number of activated B cells, but decreased amount of switched memory B cells  
273 and plasmablasts in line with hypogammaglobulinemia. Since HELIOS expression in B cells is low  
274 (Suppl Fig 2B and 3C) we reasoned the B cell defect could result from impaired T cell help to B  
275 cells. Supporting this assumption, Helios knockout mice have defective regulatory follicular T cells  
276 (Tfr) with accumulation of Tfh cells to the lymph node and aberrant germinal center formation  
277 (11). Moreover, in humans HELIOS has been suggested to have a role in the Tfh cell differentiation  
278 *in vitro* (17). To evaluate the role of HELIOS in human Tfh and Tfr cells we measured HELIOS  
279 expression in these subsets isolated from fresh lymph node samples obtained from organ donors.  
280 HELIOS expression in Tfr cells was comparable to non-follicular Tregs (Fig 5A&B). In Tfh cells  
281 HELIOS expression was lower than in Tfr but higher when compared to non-follicular effector T  
282 cells (Fig 5A&B). These data support a role for HELIOS in the follicular effector and regulatory T  
283 cell populations.

284 In peripheral blood, T cells positive for the homing marker CXCR5 and high PD1 expression  
285 form a population enriched for circulating Tfh cells. Their number was markedly lower in patients'

286 peripheral blood (Fig 5C) and we could not reliably detect circulating CD4<sup>+</sup>FOXP3<sup>+</sup>CXCR5<sup>+</sup>  
287 regulatory follicular T cells from patients while in controls they accounted for 0,23 (+/- 0,11) % of  
288 CD4<sup>+</sup> cells.

289         Since Tfh cells carry out their effector functions in lymph nodes and preanalytical factors  
290 may affect reliable CXCR5 detection, we performed immunohistochemical analyses on archival  
291 resected lymph nodes from both patients. The lymph nodes were removed due to persistent  
292 lymphadenopathy and were non-malignant. Pathologic-anatomic diagnosis on both was follicular  
293 hyperplasia, a common unspecific finding in a variety of diseases, including autoimmunity. In a  
294 more detailed immunohistochemical analysis both patients had increased CD3<sup>+</sup> cellularity in the  
295 perifollicular region. These cells expressed high levels of Bcl6 and PD1 so they most likely  
296 represent an accumulation of Tfh cells in the perifollicular region around the germinal centers  
297 (Fig 5D). We also detected an increased proliferative activity as indicated by the high Ki67 labeling  
298 index.

299         The lack of circulating Tfh cells and accumulation of Tfh-like cells in the light zones of the  
300 lymph nodes suggest a dysregulated germinal center reaction that often leads to production of  
301 autoantibodies. Both patients were at the time of clinical examination negative for anti-nuclear  
302 autoantibodies and anti-thyroid autoantibodies even though both had hypothyroidism (Suppl  
303 Clinical Data). We next measured neutralizing antibodies against cytokines because these  
304 autoantibodies have been reported in a number of immune dysregulatory conditions (31).  
305 Patient 2 had high titers of antibodies against multiple cytokines, especially type 1 interferons  
306 (Fig 5E). This anti-cytokine autoantibody profile was reminiscent of what is commonly seen in  
307 APECED patients (32) which is a syndrome of severe immune dysregulation. Patient 1 had

308 hypogammaglobulinemia and also her pneumococcal vaccine responses were impaired (Table 1  
309 & Suppl Clinical Data) so autoantibody measurements were unreliable. Anti-cytokine antibody  
310 titers against few cytokines were slightly higher in patient 1 sera compared to controls but not in  
311 the magnitude exhibited by patient 2 (Suppl Fig 6B).

312 We can conclude that patients with heterozygous p.Y200X variant in *IKZF2* had abnormal  
313 antibody findings - hypogammaglobulinemia and anti-cytokine autoantibodies - together with  
314 signs of T follicular helper cell dysregulation in the lymph nodes.

315

316 **MAIT cells are reduced in circulation and in gut epithelium of patients with the *IKZF2***  
317 **p.Y200X variant**

318 Innate lymphoid cells including Natural Killer cells (NK) have been reported to express HELIOS  
319 (33) but NK cell immunophenotyping from the patients did not show any significant perturbations  
320 in NK cell subpopulations (Suppl Fig 7). MAIT cells are innate like T cell subset contributing to  
321 bacterial and fungal defense on mucosal surfaces and have a high expression level of HELIOS (34).  
322 Since both patients had mucosal *Candida albicans* infections and recurrent bacterial infections,  
323 we next decided to analyze their MAITs. In comparison to healthy controls and unaffected  
324 relatives, the number of Valpha7.2<sup>+</sup>CD161<sup>hi</sup> T cells in circulation was markedly reduced in patients  
325 (Fig 6A&B). The small number of Valpha7.2<sup>+</sup>CD161<sup>hi</sup> T cells detected in patients also had lower  
326 HELIOS expression than healthy controls (Fig 6C). The TCR Valpha7.2 positive and CD161 high  
327 population is enriched for MAITs but it also contains conventional T cells. To more specifically  
328 measure MAIT number in our patients, we used the MR1 tetramer loaded with 5- (2-  
329 oxopropylideneamino)-6-D-ribitylaminouracil (5-OP-RU) that is specific for the invariant TCR

330 found in majority of MAITs (35). Only 84% of patients' Valpha7.2<sup>+</sup>CD161<sup>hi</sup> cells were positive for 5-  
331 OP-RU loaded MR1 tetramer compared to 97% in the controls (Fig 6D). Also, the proportion of  
332 CD8<sup>+</sup>CD4<sup>-</sup> MAITs, proposed to represent a more active phenotype (36), was lower in patients (Fig  
333 6D). The expression of activation and tissue retention marker CD69 was higher in patients' MAITs  
334 (Fig 6D). In all, the number of MAITs was reduced in patients' circulation and the remaining small  
335 Valpha7.2<sup>+</sup>CD161<sup>hi</sup> population contained more conventional T cells than that of healthy controls.

336           Reduced MAIT number in the blood can be caused by their recruitment to sites of  
337 inflammation in the periphery as seen in e.g. inflammatory bowel diseases (37). We measured  
338 MAITs by flow cytometry from intestinal biopsies taken from our patients during clinically  
339 indicated gastroscopies and a colonoscopy. Both patients had unspecific gastrointestinal  
340 complaints but no diagnostic findings were made in the endoscopies. We analyzed duodenal  
341 biopsies from both patients and a colon biopsy from patient 1. We found a low frequency of  
342 Valpha7.2<sup>+</sup>CD161<sup>hi</sup> cells in mucosal samples in both patients. The proportion of MAIT-like cells  
343 isolated from mucosal biopsies was not higher when compared with samples obtained from  
344 organ donors (Fig 6E-F). Therefore, the low proportion of MAITs in circulation appeared not to  
345 be a result of an increased accumulation to the gut mucosal sites.

346           The role of HELIOS expression in MAITs is unknown. MAITs develop in the thymus as a  
347 minor population. They expand and acquire effector memory - like phenotype quickly after  
348 egressing from the thymus (38). We wanted to evaluate at which stage of their development and  
349 function MAITs start to express high levels of HELIOS. We analysed the expression of HELIOS in  
350 developing MAITs isolated from thymic samples (n=4) acquired from children undergoing cardiac  
351 surgery. As reported before, the percentage of developing MAITs was low and only 0,025% (+/-

352 0,015%) of thymocytes were positive for the MR1-tetramer. The majority of MR1-tetramer  
353 positive thymocytes expressed HELIOS (93,5% +/- 5,6%, Suppl Fig 8D). Next, we used stimulation  
354 with *E. coli* and *C. albicans* on PBMCs (39) from healthy donors to measure if HELIOS is involved  
355 in the peripheral activation of MAITs. Unstimulated MAITs were already predominantly HELIOS  
356 positive but both microbial stimulations caused a robust upregulation of HELIOS in MAITs (Fig  
357 6G). We can therefore conclude that HELIOS is expressed both during the thymic development  
358 of MAITs and their activation in the periphery.

## 359 Discussion

360

361 Here we describe a novel immunodeficiency with signs of immune dysregulation caused by  
362 heterozygous germline loss of function mutation in *IKZF2* coding for the transcription factor  
363 HELIOS. The truncating mutation found in this single pedigree profoundly changed the ability of  
364 HELIOS to interact with proteins of the NuRD complex and other members of the IKAROS family.  
365 Affected patients had a reduced level of HELIOS expression in their peripheral T cells and specific  
366 immunophenotypic changes in T cell populations expressing high levels of HELIOS, especially  
367 MAIT cells. The immunophenotype segregated in the pedigree with the carriers of the loss-of-  
368 function *IKZF2* variant.

369 Protein interactome analysis of the truncated protein variant showed that it lost  
370 interaction with key components of the NuRD complex, the protein complex in which IKAROS  
371 family members are involved in chromatin remodelling (3). RNAseq of stimulated primary patient  
372 lymphocytes confirmed altered gene expression directly downstream of some of the  
373 transcription factors identified with the interactome analysis. For example, downstream signaling  
374 for histone acetyltransferase EP300, that we found to interact only with wild type but not with  
375 the variant protein, was altered in all three RNAseq conditions (Suppl Table 2&4). Based on our  
376 findings, the interactions with the NuRD complex are essential for HELIOS' function.

377 Helios acts mainly as a transcriptional repressor in lymphocytes (3, 4). In accordance with  
378 this, we detected increased proinflammatory signaling and production of proinflammatory  
379 cytokines and proteins in the carriers of the loss-of-function variant. The chronic overactivation  
380 of the immune system is most likely the cause for the patients' activated mature T cell - skewed

381 immunophenotype. Our detailed analysis of patients' immune system concurs with earlier data  
382 acquired in murine models, but also offers new insight into the role of HELIOS in regulating  
383 immune responses. Helios represses IL-2 production (12). In our patients, we saw enhanced IL-2  
384 production from both effector and regulatory T cells. Also the transcriptome analysis of T cells  
385 indicated increased IL-2 signaling. Interestingly, patients' cytotoxic T cells produced higher  
386 amounts of calprotectin, which is an alarmin molecule responsible for e.g. sterile inflammasome  
387 activation. Calprotectin is used in various clinical settings to evaluate subclinical systemic  
388 inflammation (40). Concomitantly the patients had increased levels of IL-1 $\beta$  cytokine, reflecting  
389 the inflammasome activation.

390         The studies on the role of Helios in controlling immune responses have mainly  
391 concentrated around its effects on regulatory T cells. Selective Helios knockdown with the FOXP3  
392 promoter is sufficient to induce autoimmunity in mice (10, 11). On the other hand, in Helios<sup>-/-</sup>  
393 mice suppressive capability of Tregs *in vitro* is intact and their *in vivo* function is only mildly  
394 impaired (11, 41). Our patients had only mild autoimmune manifestations and the Treg *in vitro*  
395 suppression assay did not indicate any reduction in suppressive capacity. Moreover, patients'  
396 Tregs were skewed towards a more mature immunophenotype with high CTLA-4 expression and  
397 signs of activation, which could indicate some compensatory mechanisms making up for the  
398 reduced HELIOS expression. Helios has been suggested to stabilize the suppressive phenotype of  
399 Tregs (12) and a loss of Helios could cause Treg conversion to effector T cells (13). Patients' Tregs  
400 had a more inflammatory phenotype with increased IL-2 production and lower FoxP3 and Helios  
401 expression, which is characteristic of unstable Tregs (13, 42). Our results confirm earlier reports  
402 that HELIOS has a limited role in stabilizing human Tregs .

403 Germline knockdown of Helios or selective knockdown of Helios with FOXP3 promoter  
404 increases germinal center formation and accumulation of Tfh and germinal center B cells in lymph  
405 nodes (11). In patients' lymph nodes we could see an accumulation of perifollicular T cells that  
406 are considered the precursor population for mature Tfh cells. Similar increase of Tfh cells in lymph  
407 nodes after immunization was evident in Helios heterozygous mice (11). Circulating PD1<sup>hi</sup>CXCR5<sup>+</sup>  
408 Tfh cells are fully mature memory cells that have exited from the germinal centers (43). In our  
409 patients, the circulating CXCR5 positive Tfh cells were almost undetectable. It is thus possible that  
410 HELIOS is required for the terminal Tfh differentiation within the germinal center. Another  
411 plausible explanation is that HELIOS is somehow involved in the Tfh egress to circulation from  
412 the germinal center.

413 One other defining feature of our patients was the marked reduction in the number of  
414 MAITs in the peripheral blood. This could be a result of increased homing of MAITs to mucosal  
415 tissues but analysis of mucosal biopsies from the patients detect only a small fraction of MAITs.  
416 Both patients suffered from recurrent mucosal *Candida albicans* infections which could be partly  
417 explained by the loss of MAITs from the mucosa that are important effectors in fungal infections  
418 (44). Deficiency of HELIOS could also harm the MAIT development in the thymus or their  
419 peripheral activation and expansion. Since the patients had so few MAITs we could only perform  
420 experiments on MAIT biology in cells from healthy donors. Based on our findings in the healthy  
421 human thymus we can conclude that HELIOS is highly expressed already in developing MAITs.  
422 However, HELIOS expression was also high in mature effector MAITs and even further  
423 upregulated after microbial stimulation. Thus, although our data is inconclusive on at which stage  
424 the loss-of-function variant in *IKZF2* could affect the MAIT numbers, our data supports a non-



425 redundant role for HELIOS in MAITs. An alternative explanation is that the chronic inflammation  
426 in patients caused the MAIT cell depletion. MAIT cell numbers have been shown to have an  
427 inverse correlation with levels of innate proinflammatory cytokines in various inflammatory  
428 conditions (45, 46).

429 Clear limitation of our study is the small number of patients from a single family. This is  
430 bound to affect e.g. RNASeq analyses since some of the differences we detected could be caused  
431 by other inheritable factors than the *IKZF2* variant. However, our results from these two patients  
432 recapitulate the main findings from Helios knock-out mice – IL-2 producing Tregs and  
433 dysregulated germinal centers. In addition to HELIOS' known effects on the immune system, we  
434 show that HELIOS has a previously underappreciated role in the MAIT cell lineage. Further studies  
435 are needed to understand what the functional significance of HELIOS is both in the control of  
436 germinal center reactions and MAITs. Heterozygous missense mutations in IKAROS cause CVID-  
437 like immunodeficiency with progressive loss of B cells in the circulation with variable penetrance  
438 of the clinical disease (7). Dominant negative mutations in IKAROS lead to an early onset  
439 combined immunodeficiency phenotype with disturbed T cells effector maturation and  
440 dysfunctional monocytes (8). These variable immunological presentations highlight the complex  
441 roles IKAROS transcription factors have as activators and repressors of transcription in the  
442 immune system. Shahin et al. show that homozygous missense mutation in HELIOS leads to  
443 combined immunodeficiency with hypofunctional T cells while the truncating variant in our  
444 patients leads to overactivation of the immune system with relatively mild immunodeficiency.  
445 These different presentations emphasize how highly variable functions HELIOS has in T cells.

446

447 **Materials and methods**

448

449 **Study subjects and samples**

450 The study was conducted according to the principles of the Declaration of Helsinki. The study was  
451 approved by the ethics committee of Helsinki University Hospital (138/13/03/00/2013 and  
452 HUS/747/2019) and written informed consent was obtained from participants. The control group  
453 for blood samples consisted of 25 healthy individuals aged 24-66 (mean 46) years, 14 of them  
454 female. In addition samples were acquired from two relatives of the patients without mutation  
455 in *IKZF2* gene. The number of controls varied among experiments and it is indicated either in the  
456 figures or in the text. In experiments containing less than 10 healthy controls the controls were  
457 sex and age matched. Patients have approved the publication of the manuscript.

458 Patients' clinical T- and B- cell phenotype, total blood count, immunoglobulin levels,  
459 complement activity and anti-tetanus and -diphtheria antibodies were evaluated by clinically  
460 validated test in Tampere University Hospital's clinical laboratory Fimlab (Tampere,  
461 Finland). Samples from duodenum and colon were acquired from the patients during diagnostic  
462 endoscopy. Lymph node samples from patients were archival diagnostic samples. Control tissues  
463 samples were obtained from organ donors: duodenum from four individuals (34-69 years,  
464 2/4 female) and colon from one individual (a female in her 40s), and 4 lymph node samples  
465 for characterization of follicular T cells (age range 19-41, all male). The human thymi were  
466 obtained from four children undergoing cardiac surgery ( three infants, one teen, 3/4 females).

467

468

## 469 **DNA extraction and sequencing**

470 Genomic DNA was extracted from EDTA blood with the Qiagen FlexiGene DNA kit (Qiagen) or  
471 from Oragene OG-575 saliva collection kit with the prepIT-L2P kit (DNA Genotek). For RT-PCR,  
472 RNA was extracted with the Qiagen miRNeasy kit (Qiagen) from freshly isolated PBMCs, and  
473 reverse transcribed into cDNA using SuperScript™ VILO™ cDNA Synthesis Kit (ThermoFisher).  
474 Exome and capillary sequencing were performed at the sequencing core facility of the Institute  
475 for Molecular Medicine Finland (FIMM). Exome libraries were generated using the Clinical  
476 Research Exome (Agilent Technologies) or the Nextera Flex (Illumina) capture kits, and  
477 sequencing was performed with 101 bp read length on the HiSeq1500 or the NovaSeq6000  
478 Sequencing Systems (Illumina) or the NovaSeq 6000 Sequencing System (Illumina), respectively.  
479 Read mapping and variant calling were performed with an in-house pipeline. Variant annotation  
480 was performed with ANNOVAR(47). Variant data was filtered following a dominant inheritance  
481 model as described in Suppl Table 1. For frequency filtering, we utilized population level variant  
482 frequency data from the Genome Aggregation Database (gnomAD) (48) and 1000 genomes(49).  
483 Recurrent sequencing artefacts and bad quality variants were excluded based on in-house data  
484 and visual inspection of reads on the Integrative Genomics Viewer(50). Candidate variants were  
485 validated by targeted PCR by DreamTaq Green PCR Master Mix (ThermoFisher)and capillary  
486 sequencing on the ABI3730XL DNA Analyzer (Applied Biosystems). All primers used for PCR and  
487 capillary sequencing are listed in Supplemental Table 5.

## 488 **Protein-protein interaction analysis**

489 Biotin proximity ligation assay was done with stable cell lines, generated from Flp-In™ T-REX™  
490 293, expressing HELIOS constructs with N-terminal MAC tag ((51). Cell line generation, sample  
491 preparation and mass spectrometry was done as previously described (51), with the exception of  
492 using 1% N-dodecyl maltoside instead of 0.5% IGEPAL in the lysis and wash buffers.

493 Peptides with a false discovery rate (FDR) of <0.05, were exported from the peptides detected  
494 with mass spectrometry. Identified proteins were compared against the Contaminant repository  
495 for affinity purification database (52). Only interactions with <20% frequency and 2-fold higher  
496 abundance, compared to the corresponding protein values in the controls database, where  
497 classified as high-confidence interactions. The Cytoscape software platform (53) was used to  
498 visualize the high-confidence protein-protein interactions. ClueGo plugin (24) was utilized for  
499 clustering of biological processes the identified proteins contributed to.

500

### 501 **Co-immunoprecipitation**

502  $6 \times 10^5$  HEK293 cells were plated in 6-well plate wells and transfected on the next day. Each was  
503 co-transfected with 1  $\mu$ g of either HA tagged wild type IKZF2 or C600A IKZF2 and V5 tagged IKZF1  
504 or IKZF3. 24h after transfection, cells were washed with cold PBS, lysed on ice for 15 min in 1 ml  
505 of ice-cold lysis buffer (0.5% IGEPAL, 50mM HEPS, 5mM EDTA, 150mM NaCl, 50mM NaF pH 8.0  
506 supplemented with 1mM DTT, 1mM PMSF, 1,5mM NaVO<sub>4</sub>, 1x Sigma protease inhibitor cocktail).  
507 Lysates were pipetted into fresh 1.5 ml tubes and centrifuged 16 000g, +4°C for 15 min to remove  
508 insoluble debris. 20  $\mu$ l of supernatants were taken into fresh tubes with 20  $\mu$ l 2x laemmli sample  
509 buffer and incubated at 95°C for 5 min (lysate sample). 950  $\mu$ l of supernatants were moved to  
510 new tubes with 30  $\mu$ l of washed anti-HA beads (A2095, Sigma), and incubated 2h on rotation in

511 +4°C. Beads were spun down and the supernatant was discarded. The beads were washed  
512 three times with 1 ml of ice-cold lysis buffer. The immunoprecipitated proteins were eluted with  
513 a 2x laemmli sample buffer and incubated at 95°C for 5 min and the beads were spun down  
514 (Co-IP sample).

515

#### 516 **Western blot analysis**

517 Co-immunoprecipitation (10 µl) and lysate (5 µl) samples were loaded on precast SDS-PAGE gels  
518 (any kD gel with 15 wells, Mini-Protean TGX, Bio-Rad) and transferred onto nitrocellulose  
519 membrane (NBA085C001EA, PerkinElmer) with semi-dry transfer (Trans-blot SD semi-dry  
520 transfer cell, Bio-Rad). The membranes were blocked with 5% milk – in 0.05% Tween – TBS. HA  
521 antigen was detected with primary HA antibody (16B12 Biolegend, 1:2000 dilution in blocking  
522 solution), V5 antigen was detected with primary V5 antibody (R960-25 Invitrogen, 1:5000 dilution  
523 in blocking solution). Primary antibodies were detected with a secondary antibody coupled to  
524 HRP (NA931 GE, 1:1000 dilution in blocking solution). ECL reaction (RPN2232, Amersham) was  
525 developed on photographic films (Super RX-N, Fuji X-ray films).

526

#### 527 **Sample preparation**

528 Blood was drawn into Li-heparin Vacutainer tubes (BD Biosciences), plasma was separated by  
529 centrifugation, and PBMCs isolated using Ficoll-Paque (GE Lifesciences) gradient centrifugation.  
530 The cells were cryopreserved using CTL-Cryo ABC (CTL) kit. Cryopreserved samples were used  
531 unless otherwise stated.

532 Sample resectates from duodenum, lymph nodes and thymus were wrapped in tissues dampened  
533 with cold saline solution and kept on ice. Duodenal biopsies were transported in full media and  
534 kept on ice. Immune cells from fresh tissues were extracted within a maximum of 6 hours of  
535 operation and analyzed subsequently. The duodenal samples were cut in small pieces, rinsed  
536 with PBS and incubated in 5 mL of enzyme solution (RPMI containing 15 mM HEPES, 0.25 mg/mL  
537 of DNase I and 0.25 mg/mL of collagenase II) on a magnetic shaker in +37°C water bath for 20-30  
538 min. The tissue digest was filtered with 100 micron filter and washed first with cold PBS  
539 containing 10% FCS or human AB media. Lymph nodes were identified from ileal mesenterium  
540 and excess adipose tissue was removed. Lymphocytes were mechanically extracted using a 40  
541 micron filter and a plunger. Thymocytes were released with mechanical homogenisation of the  
542 thymic resectate. All single cell sample solutions were washed 2 times with Staining buffer (PBS  
543 containing 2% FCS and 2 mM EDTA) before use in downstream applications.

544

#### 545 **Flow cytometry**

546 For staining of surface antigens fresh or thawed cells were incubated 30 minutes at +4c with  
547 antibodies and with Live/dead Fixable Green Dead Cell Stain (at dilution of 1:500; ThermoFisher)  
548 that were diluted in Brilliant Stain Buffer (BD Bioscience). When applicable the cells were  
549 incubated with MR-1 tetramer (1:2500) in +37c for 45 minutes and washed before continuing to  
550 other surface markers. For staining of transcription factors and Ki67 the cells were permeabilized  
551 after surface staining with FoxP3 transcription factor staining set (eBioscience) for and with  
552 Fixation/Permeabilisation Solution kit (BD Bioscience) for detection of intracellular cytokines as  
553 instructed by manufacturer. The samples were run using LSR Fortessa (BD Biosciences) and

554 analyzed with FlowJo (BD Biosciences, LLC). The antibodies used in the study are shown in  
555 Supplementary Table X. Optimal concentration for antibodies was titrated with live PBMCs.

556

### 557 **Cell separation**

558 Purification of CD3<sup>+</sup> T cells or CD8<sup>+</sup> T - cells from freshly isolated PBMCs was done with Pan T cell  
559 or CD8 Microbead isolation kit using LS Columns (both Miltenyi Biotec). Purity of CD3<sup>+</sup> cells was  
560 on average 97 (+/-1,2)% purity and CD8s 93 (+/-5,1)%. CD4<sup>+</sup>CD25<sup>+</sup>CD127<sup>-</sup> cells were sorted from  
561 freshly isolated PBMC with BD FACSAria II instrument (BD Biosciences). Prior sorting CD4 cells  
562 were enriched with Human CD4<sup>+</sup> T Cell Enrichment Cocktail (Stemcell Technologies) when  
563 isolating CD4<sup>+</sup>CD25<sup>+</sup>CD127<sup>-</sup> for suppression analysis.

564

### 565 **IL-2 induced STAT5 phosphorylation**

566 Intracellular staining for phosphorylated STAT5 (pSTAT5) was performed on thawed PBMCs  
567 allowed to recover for 16 hours in complete medium. Cells were counted and seeded at 150,000  
568 cells per well in 96-well plates at a volume of 100 µL in complete medium. After 30 minutes of  
569 incubation at 37°C, cells were stimulated with IL-2 (200 U/mL for 7.5, 15 or 30 minutes and fixed  
570 for 10 minutes at 37°C with prewarmed paraformaldehyde (at a final concentration of 2%). Cells  
571 were then washed twice and permeabilized with prechilled (-20°C) BD Phosflow Perm Buffer III  
572 (BD Biosciences). After 30 minutes on ice, cells were washed twice with 2% FBS in 1xPBS and  
573 stained for 35 minutes on ice with antibodies Cells were washed twice with 2% FBS in 1xPBS and  
574 suspended in the same buffer for analysis.

### 575 **Evaluation of Treg suppressor capacity**

576 CD4<sup>+</sup>CD25<sup>+</sup>CD127<sup>-</sup> Treg cells were incubated for 6 days with carboxyfluorescein diacetate  
577 succinimidyl ester–labeled autologous responder T cells in ratio of 1:1. Anti-CD3/anti-CD28 beads  
578 (Life Technologies) were used as stimulus. CD4<sup>+</sup> cells were analyzed and the suppression  
579 percentage was calculated with the following formula:  $100 - ([\% \text{ proliferation in presence of}$   
580  $\text{Treg} / \% \text{ proliferation in absence of Treg}] \times 100)$ .

581

### 582 **T cell activation cultures**

583 TCR activation for freshly isolated cells in vitro was done in flat-bottom plate coated with  
584 unconjugated CD3- and CD28-antibodies (Immunotools) and cells were cultured in CTL test media  
585 (Immunospot). After overnight stimulation Brefeldin A (BD Biosciences) was added for the last 6  
586 hours of stimulation after which the cells were collected for intracellular cytokine staining. Similar  
587 stimulation without brefeldin was done for RNASeq. After 24h stimulation cells were collected  
588 for RNAseq and stored at -80c before analysis.

589 MAIT cell stimulation with *E. coli* and *Candida albicans* was done as previously described  
590 (39). Briefly, microbes were fixed with CellFIX (BD Biosciences) and added to the cell culture in  
591 concentration of  $6 \times 10^6$  CFU for *E. coli* and  $3 \times 10^6$  CFU for *C. albicans*. Unconjugated anti-CD28  
592 antibody was added after one hour of culture with the fixed microbes. Cells were incubated for  
593 a total of 24 hrs. For a positive control, a commercial PMA/ionomycin preparation was used  
594 (Leukocyte Activation Cocktail, with BD GolgiPlug™, BD Biosciences) for six hours.

595

### 596 **NanoString analysis of patient PBMCs**



597 RNA extraction was performed with RNeasy Mini Kit (Qiagen Hilden) as instructed by  
598 manufacturer from snap-frozen PBMCs, and 100 ng RNA in 5 µl volume was taken for NanoString  
599 gene expression analysis (NanoString Technologies). Our custom gene set consisted of 45 genes  
600 targeting IFN-regulated genes, JAK/STAT and NFκB signaling related genes. Also five  
601 housekeeping genes were included in the analysis. Further details of the code set, hybridization,  
602 scanning and data analysis are described elsewhere(25).

603

### 604 **3' RNA-seq**

605 RNA extraction was done with Qiagen miRNeasy Micro Kit (Qiagen Hilden). Quality and quantity  
606 of the extracted RNA samples was analyzed with 2100 Bioanalyzer using RNA 6000 Pico Kit  
607 (Agilent, Santa Clara, CA, USA). Single-indexed mRNA libraries were prepared with minimum  
608 input of each sample with QuantSeq 3' mRNA-Seq Library Prep Kit FWD (Lexogen GmbH)  
609 according to user guide version 015UG009V0240 or 015UG009V0220. For CD3+ and Treg samples  
610 samples, globin mRNAs were removed from samples with Globin Block Module (Lexogen) and 6  
611 bp Unique Molecular Identifiers (UMI) introduced with UMI Second Strand Synthesis Module  
612 (Lexogen) for detection and removal of PCR duplicates. Quality of libraries was measured using  
613 2100 Bioanalyzer DNA High Sensitivity Kit (Agilent). Sequencing was performed with HiSeq 2500  
614 System (Illumina) in high output run mode using v4 chemistry. Read length for the paired-end  
615 run was 2x101 bp and target coverage of 5 M reads for each library. QuantSeq 3' mRNA-Seq  
616 Integrated Data Analysis Pipeline on Bluebee® (Lexogen GmbH) was used for preliminary quality  
617 evaluation of the RNA sequencing data and to obtain gene specific read counts. Data were  
618 analyzed utilizing Chipster v3.14 (54). Differential expression analysis was done using EdgeR for

619 multivariate experiments either with 1 main effect (disease status in analysis of non-treated  
620 samples) or with two main effects (disease status and sample pairs in treated vs. untreated  
621 analysis) with TMM-normalization using Log2 transformation. Genes with <5 counts in <2  
622 samples were removed from analyses. An adjusted p-value (FDR) of 0.05 was used as limit for  
623 significantly differentially expressed genes. Correlation and volcano plots were generated using  
624 the ggplot2 package in R. For pathway analysis data were analyzed through the use of IPA  
625 (QIAGEN Inc., <https://www.qiagenbioinformatics.com/products/ingenuitypathway-analysis>).

## 626 **Monocyte activation**

627 Thawed human PBMCs were suspended in RPMI 1640 (Biowhittaker/Lonza) media, supplemented  
628 with 25 mM HEPES (Lonza), 100 U/ml penicillin and 100 µg/ml streptomycin, L-glutamine and  
629 10% fetal calf serum (all from Gibco) and incubated o/n at +37°C. The cells were activated with 1  
630 µg/ml LPS (Sigma) for 4 hours and thereafter the NLRP3 inflammasome was activated by using 5  
631 mM neutralized ATP (Sigma) for 45 min.

632

## 633 **Cytokine and cell death measurements cell, and measurement of inflammasome components** 634 **with RT-PCR**

635 ELISA kit for il-1β (high sensitivity, ThermoFisher) was used as instructed by the manufacturer to  
636 quantify cytokine concentrations from serum. Serum calprotectin levels were measured with  
637 clinically validated test in HUSLAB (Helsinki University Hospital, Helsinki, Finland). The mature,  
638 cleaved form of IL-1β was measured from cell culture supernatants using Human IL-1β/IL-1F2  
639 DuoSet ELISA (R&D Systems). Cell death was analyzed from the cell culture supernatants using  
640 lactate dehydrogenase detection kit (Roche Diagnostics).

641           After monocyte activation, total cellular RNA was purified using RNeasy Plus Mini kit  
642 (Qiagen), followed by cDNA synthesis with iScript kit (BioRad). Quantitative PCR was performed  
643 from 5 ng of cDNA per reaction using HOT FIREPol Evagreen qPCR SuperMix (Solis BioDyne) and  
644 LightCycler96 instrument (Roche). See Supplementary Table 5 for the primer sequences. Relative  
645 gene expression was calculated using the  $2(-\Delta\Delta Ct)$  method using *RPLP0* and *CASC3* as the  
646 housekeeping genes.

647

#### 648 **Histology**

649 The immunohistochemistry stainings of lymph node biopsies were performed in HUSLAB  
650 Pathology Department (Helsinki University Hospital, Helsinki, Finland) with clinically validated  
651 antibodies and protocols.

652

#### 653 **Auto-antibodies**

654 Autoantibodies were measured as previously described with luciferase immunoprecipitation  
655 analysis (32).

656 **References and notes**

- 657 1. A. Rebollo, C. Schmitt, Ikaros, Aiolos and Helios: transcription regulators and lymphoid  
658 malignancies. *Immunol. Cell Biol.* **81**, 171–175 (2003).
- 659 2. J. Kim, S. Sif, B. Jones, A. Jackson, J. Koipally, E. Heller, S. Winandy, A. Viel, A. Sawyer, T.  
660 Ikeda, R. Kingston, K. Georgopoulos, Ikaros DNA-binding proteins direct formation of  
661 chromatin remodeling complexes in lymphocytes. *Immunity.* **10**, 345–355 (1999).
- 662 3. R. Sridharan, S. T. Smale, Predominant interaction of both Ikaros and Helios with the NuRD  
663 complex in immature thymocytes. *J. Biol. Chem.* **282**, 30227–30238 (2007).
- 664 4. K. Georgopoulos, The making of a lymphocyte: the choice among disparate cell fates and  
665 the IKAROS enigma. *Genes Dev.* **31**, 439–450 (2017).
- 666 5. S. Asanuma, M. Yamagishi, K. Kawanami, K. Nakano, A. Sato-Otsubo, S. Muto, M. Sanada,  
667 T. Yamochi, S. Kobayashi, A. Utsunomiya, M. Iwanaga, K. Yamaguchi, K. Uchimaru, S.  
668 Ogawa, T. Watanabe, Adult T-cell leukemia cells are characterized by abnormalities of  
669 Helios expression that promote T cell growth. *Cancer Sci.* **104**, 1097–1106 (2013).
- 670 6. S.-M. Park, H. Cho, A. M. Thornton, T. S. Barlowe, T. Chou, S. Chhangawala, L. Fairchild, J.  
671 Taggart, A. Chow, A. Schurer, A. Gruet, M. D. Witkin, J. H. Kim, E. M. Shevach, A. Krivtsov,  
672 S. A. Armstrong, C. Leslie, M. G. Kharas, IKZF2 Drives Leukemia Stem Cell Self-Renewal and  
673 Inhibits Myeloid Differentiation. *Cell Stem Cell.* **24**, 153–165.e7 (2019).
- 674 7. H. S. Kuehn, B. Boisson, C. Cunningham-Rundles, J. Reichenbach, A. Stray-Pedersen, E. W.

- 675 Gelfand, P. Maffucci, K. R. Pierce, J. K. Abbott, K. V. Voelkerding, S. T. South, N. H.  
676 Augustine, J. S. Bush, W. K. Dolen, B. B. Wray, Y. Itan, A. Cobat, H. S. Sorte, S. Ganesan, S.  
677 Prader, T. B. Martins, M. G. Lawrence, J. S. Orange, K. R. Calvo, J. E. Niemela, J.-L.  
678 Casanova, T. A. Fleisher, H. R. Hill, A. Kumánovics, M. E. Conley, S. D. Rosenzweig, Loss of B  
679 Cells in Patients with Heterozygous Mutations in IKAROS. *N. Engl. J. Med.* **374**, 1032–1043  
680 (2016).
- 681 8. D. Boutboul, H. S. Kuehn, Z. Van de Wyngaert, J. E. Niemela, I. Callebaut, J. Stoddard, C.  
682 Lenoir, V. Barlogis, C. Farnarier, F. Vely, N. Yoshida, S. Kojima, H. Kanegane, A. Hoshino, F.  
683 Hauck, L. Lhermitte, V. Asnafi, P. Roehrs, S. Chen, J. W. Verbsky, K. R. Calvo, A. Husami, K.  
684 Zhang, J. Roberts, D. Amrol, J. Sleaseman, A. P. Hsu, S. M. Holland, R. Marsh, A. Fischer, T.  
685 A. Fleisher, C. Picard, S. Latour, S. D. Rosenzweig, Dominant-negative IKZF1 mutations  
686 cause a T, B, and myeloid cell combined immunodeficiency. *J. Clin. Invest.* **128**, 3071–3087  
687 (2018).
- 688 9. Q. Cai, A. Dierich, M. Oulad-Abdelghani, S. Chan, P. Kastner, Helios deficiency has minimal  
689 impact on T cell development and function. *J. Immunol.* **183**, 2303–2311 (2009).
- 690 10. H.-J. Kim, R. A. Barnitz, T. Kreslavsky, F. D. Brown, H. Moffett, M. E. Lemieux, Y. Kaygusuz,  
691 T. Meissner, T. A. W. Holderried, S. Chan, P. Kastner, W. N. Haining, H. Cantor, Stable  
692 inhibitory activity of regulatory T cells requires the transcription factor Helios. *Science.* **350**,  
693 334–339 (2015).
- 694 11. M. Sebastian, M. Lopez-Ocasio, A. Metidji, S. A. Rieder, E. M. Shevach, A. M. Thornton,

- 695 Helios Controls a Limited Subset of Regulatory T Cell Functions. *J. Immunol.* **196**, 144–155  
696 (2016).
- 697 12. I. Baine, S. Basu, R. Ames, R. S. Sellers, F. Macian, Helios induces epigenetic silencing of IL2  
698 gene expression in regulatory T cells. *J. Immunol.* **190**, 1008–1016 (2013).
- 699 13. H. Nakagawa, J. M. Sido, E. E. Reyes, V. Kiers, H. Cantor, H.-J. Kim, Instability of Helios-  
700 deficient Tregs is associated with conversion to a T-effector phenotype and enhanced  
701 antitumor immunity. *Proc. Natl. Acad. Sci. U. S. A.* **113**, 6248–6253 (2016).
- 702 14. M. E. Himmel, K. G. MacDonald, R. V. Garcia, T. S. Steiner, M. K. Levings, Helios+ and  
703 Helios- cells coexist within the natural FOXP3+ T regulatory cell subset in humans. *J.*  
704 *Immunol.* **190**, 2001–2008 (2013).
- 705 15. T. Akimova, U. H. Beier, L. Wang, M. H. Levine, W. W. Hancock, Helios expression is a  
706 marker of T cell activation and proliferation. *PLoS One.* **6**, e24226 (2011).
- 707 16. C. Peters, H.-H. Oberg, D. Kabelitz, D. Wesch, Phenotype and regulation of  
708 immunosuppressive V $\delta$ 2-expressing  $\gamma\delta$  T cells. *Cell. Mol. Life Sci.* **71**, 1943–1960 (2014).
- 709 17. K. Serre, C. Bénézech, G. Desanti, S. Bobat, K.-M. Toellner, R. Bird, S. Chan, P. Kastner, A. F.  
710 Cunningham, I. C. M. Maclennan, E. Mohr, Helios is associated with CD4 T cells  
711 differentiating to T helper 2 and follicular helper T cells in vivo independently of Foxp3  
712 expression. *PLoS One.* **6**, e20731 (2011).
- 713 18. T. A. Doering, A. Crawford, J. M. Angelosanto, M. A. Paley, C. G. Ziegler, E. J. Wherry,

- 714 Network analysis reveals centrally connected genes and pathways involved in CD8+ T cell  
715 exhaustion versus memory. *Immunity*. **37**, 1130–1144 (2012).
- 716 19. A. Crawford, J. M. Angelosanto, C. Kao, T. A. Doering, P. M. Odorizzi, B. E. Barnett, E. J.  
717 Wherry, Molecular and transcriptional basis of CD4<sup>+</sup> T cell dysfunction during chronic  
718 infection. *Immunity*. **40**, 289–302 (2014).
- 719 20. E. V. Davydov, D. L. Goode, M. Sirota, G. M. Cooper, A. Sidow, S. Batzoglou, Identifying a  
720 high fraction of the human genome to be under selective constraint using GERP++. *PLoS*  
721 *Comput. Biol.* **6**, e1001025 (2010).
- 722 21. K. J. Roux, D. I. Kim, B. Burke, *Curr. Protoc. Protein Sci.*, in press.
- 723 22. T. Yoshida, K. Georgopoulos, Ikaros fingers on lymphocyte differentiation. *Int. J. Hematol.*  
724 **100**, 220–229 (2014).
- 725 23. C. Dege, J. Hagman, Mi-2/NuRD chromatin remodeling complexes regulate B and T-  
726 lymphocyte development and function. *Immunol. Rev.* **261**, 126–140 (2014).
- 727 24. G. Bindea, B. Mlecnik, H. Hackl, P. Charoentong, M. Tosolini, A. Kirilovsky, W.-H. Fridman,  
728 F. Pagès, Z. Trajanoski, J. Galon, ClueGO: a Cytoscape plug-in to decipher functionally  
729 grouped gene ontology and pathway annotation networks. *Bioinformatics*. **25**, 1091–1093  
730 (2009).
- 731 25. S. Keskitalo, E. Haapaniemi, E. Einarsdottir, K. Rajamäki, H. Heikkilä, M. Ilander, M.  
732 Pöyhönen, E. Morgunova, K. Hokynar, S. Lagström, S. Kivirikko, S. Mustjoki, K. Eklund, J.

- 733 Saarela, J. Kere, M. R. J. Seppänen, A. Ranki, K. Hannula-Jouppi, M. Varjosalo, Novel  
734 TMEM173 Mutation and the Role of Disease Modifying Alleles. *Front. Immunol.* **10**, 2770  
735 (2019).
- 736 26. M. Pruenster, T. Vogl, J. Roth, M. Sperandio, S100A8/A9: From basic science to clinical  
737 application. *Pharmacol. Ther.* **167**, 120–131 (2016).
- 738 27. A. Åsberg, L. Løfblad, A. Felic, G. G. Hov, Measuring calprotectin in plasma and blood with a  
739 fully automated turbidimetric assay. *Scand. J. Clin. Lab. Invest.*, 1–8 (2019).
- 740 28. M. Frosch, M. Ahlmann, T. Vogl, H. Wittkowski, N. Wulffraat, D. Foell, J. Roth, The myeloid-  
741 related proteins 8 and 14 complex, a novel ligand of toll-like receptor 4, and interleukin-  
742 1beta form a positive feedback mechanism in systemic-onset juvenile idiopathic arthritis.  
743 *Arthritis Rheum.* **60**, 883–891 (2009).
- 744 29. M. Pesu, W. T. Watford, L. Wei, L. Xu, I. Fuss, W. Strober, J. Andersson, E. M. Shevach, M.  
745 Quezado, N. Bouladoux, A. Roebroek, Y. Belkaid, J. Creemers, J. J. O’Shea, T-cell-expressed  
746 proprotein convertase furin is essential for maintenance of peripheral immune tolerance.  
747 *Nature.* **455**, 246–250 (2008).
- 748 30. R. Elhage, M. Cherai, B. Levacher, G. Darrasse-Jeze, C. Baillou, X. Zhao, A.-M. Khatib, E.  
749 Piaggio, D. Klatzmann, C-terminal cleavage of human Foxp3 at a proprotein convertase  
750 motif abrogates its suppressive function. *Scand. J. Immunol.* **81**, 229–239 (2015).
- 751 31. T. Vincent, M. Plawecki, R. Goulabchand, P. Guilpain, J. F. Eliaou, Emerging clinical  
752 phenotypes associated with anti-cytokine autoantibodies. *Autoimmun. Rev.* **14**, 528–535



753 (2015).

754 32. J. Kärner, A. Meager, M. Laan, J. Maslovska, M. Pihlap, A. Remm, E. Juronen, A. S. B.

755 Wolff, E. S. Husebye, K. T. Podkrajšek, N. Bratanic, T. Battelino, N. Willcox, P. Peterson, K.

756 Kisand, Anti-cytokine autoantibodies suggest pathogenetic links with autoimmune

757 regulator deficiency in humans and mice. *Clin. Exp. Immunol.* **171**, 263–272 (2013).

758 33. L. Mazzurana, M. Forkel, A. Rao, A. Van Acker, E. Kokkinou, T. Ichiya, S. Almer, C. Höög, D.

759 Friberg, J. Mjösberg, Suppression of Aiolos and Ikaros expression by lenalidomide reduces

760 human ILC3-ILC1/NK cell transdifferentiation. *Eur. J. Immunol.* **49**, 1344–1355 (2019).

761 34. A. Gibbs, E. Leeansyah, A. Introini, D. Paquin-Proulx, K. Hasselrot, E. Andersson, K.

762 Broliden, J. K. Sandberg, A. Tjernlund, MAIT cells reside in the female genital mucosa and

763 are biased towards IL-17 and IL-22 production in response to bacterial stimulation.

764 *Mucosal Immunol.* **10**, 35–45 (2017).

765 35. A. J. Corbett, S. B. G. Eckle, R. W. Birkinshaw, L. Liu, O. Patel, J. Mahony, Z. Chen, R.

766 Reantragoon, B. Meehan, H. Cao, N. A. Williamson, R. A. Strugnell, D. Van Sinderen, J. Y. W.

767 Mak, D. P. Fairlie, L. Kjer-Nielsen, J. Rossjohn, J. McCluskey, T-cell activation by transitory

768 neo-antigens derived from distinct microbial pathways. *Nature.* **509**, 361–365 (2014).

769 36. J. Dias, C. Boulouis, J.-B. Gorin, R. H. G. A. van den Biggelaar, K. G. Lal, A. Gibbs, L. Loh, M.

770 Y. Gulam, W. R. Sia, S. Bari, W. Y. K. Hwang, D. F. Nixon, S. Nguyen, M. R. Betts, M. Buggert,

771 M. A. Eller, K. Broliden, A. Tjernlund, J. K. Sandberg, E. Leeansyah, The CD4-CD8- MAIT cell

772 subpopulation is a functionally distinct subset developmentally related to the main CD8+

- 773 MAIT cell pool. *Proc. Natl. Acad. Sci. U. S. A.* **115**, E11513–E11522 (2018).
- 774 37. N.-E. Serriari, M. Eoche, L. Lamotte, J. Lion, M. Fumery, P. Marcelo, D. Chatelain, A. Barre,  
775 E. Nguyen-Khac, O. Lantz, J.-L. Dupas, E. Treiner, Innate mucosal-associated invariant T  
776 (MAIT) cells are activated in inflammatory bowel diseases. *Clin. Exp. Immunol.* **176**, 266–  
777 274 (2014).
- 778 38. D. I. Godfrey, H.-F. Koay, J. McCluskey, N. A. Gherardin, The biology and functional  
779 importance of MAIT cells. *Nat. Immunol.* **20**, 1110–1128 (2019).
- 780 39. J. Dias, J. K. Sandberg, E. Leeansyah, Extensive Phenotypic Analysis, Transcription Factor  
781 Profiling, and Effector Cytokine Production of Human MAIT Cells by Flow Cytometry.  
782 *Methods Mol. Biol.* **1514**, 241–256 (2017).
- 783 40. D. Holzinger, K. Tenbrock, J. Roth, Alarmins of the S100-Family in Juvenile Autoimmune  
784 and Auto-Inflammatory Diseases. *Front. Immunol.* **10**, 182 (2019).
- 785 41. A. M. Thornton, J. Lu, P. E. Korty, Y. C. Kim, C. Martens, P. D. Sun, E. M. Shevach, Helios+  
786 and Helios- Treg subpopulations are phenotypically and functionally distinct and express  
787 dissimilar TCR repertoires. *Eur. J. Immunol.* (2019), doi:10.1002/eji.201847935.
- 788 42. H. Bendfeldt, M. Benary, T. Scheel, K. Steinbrink, A. Radbruch, H. Herzel, R. Baumgrass, IL-2  
789 Expression in Activated Human Memory FOXP3(+) Cells Critically Depends on the Cellular  
790 Levels of FOXP3 as Well as of Four Transcription Factors of T Cell Activation. *Front.*  
791 *Immunol.* **3**, 264 (2012).

- 792 43. L. A. Vella, M. Buggert, S. Manne, R. S. Herati, I. Sayin, L. Kuri-Cervantes, I. Bukh Brody, K.  
793 C. O'Boyle, H. Kaprielian, J. R. Giles, S. Nguyen, A. Muselman, J. P. Antel, A. Bar-Or, M. E.  
794 Johnson, D. H. Canaday, A. Naji, V. V. Ganusov, T. M. Laufer, A. D. Wells, Y. Dori, M. G.  
795 Itkin, M. R. Betts, E. J. Wherry, T follicular helper cells in human efferent lymph retain  
796 lymphoid characteristics. *J. Clin. Invest.* **129**, 3185–3200 (2019).
- 797 44. E. W. Meermeier, M. J. Harriff, E. Karamooz, D. M. Lewinsohn, MAIT cells and microbial  
798 immunity. *Immunol. Cell Biol.* **96**, 607–617 (2018).
- 799 45. A. Willing, O. A. Leach, F. Ufer, K. E. Attfield, K. Steinbach, N. Kursawe, M. Piedavent, M. A.  
800 Friese, CD8<sup>+</sup> MAIT cells infiltrate into the CNS and alterations in their blood frequencies  
801 correlate with IL-18 serum levels in multiple sclerosis. *Eur. J. Immunol.* **44**, 3119–3128  
802 (2014).
- 803 46. A. Chiba, N. Tamura, K. Yoshikiyo, G. Murayama, M. Kitagaichi, K. Yamaji, Y. Takasaki, S.  
804 Miyake, Activation status of mucosal-associated invariant T cells reflects disease activity  
805 and pathology of systemic lupus erythematosus. *Arthritis Res. Ther.* **19**, 58 (2017).
- 806 47. K. Wang, M. Li, H. Hakonarson, ANNOVAR: functional annotation of genetic variants from  
807 high-throughput sequencing data. *Nucleic Acids Res.* **38**, e164 (2010).
- 808 48. K. J. Karczewski, L. C. Francioli, G. Tiao, B. B. Cummings, J. Alföldi, Q. Wang, R. L. Collins, K.  
809 M. Laricchia, A. Ganna, D. P. Birnbaum, L. D. Gauthier, H. Brand, M. Solomonson, N. A.  
810 Watts, D. Rhodes, M. Singer-Berk, E. M. England, E. G. Seaby, J. A. Kosmicki, R. K. Walters,  
811 K. Tashman, Y. Farjoun, E. Banks, T. Poterba, A. Wang, C. Seed, N. Whiffin, J. X. Chong, K. E.

- 812 Samocha, E. Pierce-Hoffman, Z. Zappala, A. H. O'Donnell-Luria, E. V. Minikel, B. Weisburd,  
813 M. Lek, J. S. Ware, C. Vittal, I. M. Armean, L. Bergelson, K. Cibulskis, K. M. Connolly, M.  
814 Covarrubias, S. Donnelly, S. Ferriera, S. Gabriel, J. Gentry, N. Gupta, T. Jeandet, D. Kaplan,  
815 C. Llanwarne, R. Munshi, S. Novod, N. Petrillo, D. Roazen, V. Ruano-Rubio, A. Saltzman, M.  
816 Schleicher, J. Soto, K. Tibbetts, C. Tolonen, G. Wade, M. E. Talkowski, Genome Aggregation  
817 Database Consortium, B. M. Neale, M. J. Daly, D. G. MacArthur, The mutational constraint  
818 spectrum quantified from variation in 141,456 humans. *Nature*. **581**, 434–443 (2020).
- 819 49. 1000 Genomes Project Consortium, A. Auton, L. D. Brooks, R. M. Durbin, E. P. Garrison, H.  
820 M. Kang, J. O. Korbel, J. L. Marchini, S. McCarthy, G. A. McVean, G. R. Abecasis, A global  
821 reference for human genetic variation. *Nature*. **526**, 68–74 (2015).
- 822 50. J. T. Robinson, H. Thorvaldsdóttir, A. M. Wenger, A. Zehir, J. P. Mesirov, Variant Review  
823 with the Integrative Genomics Viewer. *Cancer Res*. **77**, e31–e34 (2017).
- 824 51. X. Liu, K. Salokas, F. Tamene, Y. Jiu, R. G. Weldatsadik, T. Öhman, M. Varjosalo, An AP-MS-  
825 and BioID-compatible MAC-tag enables comprehensive mapping of protein interactions  
826 and subcellular localizations. *Nat. Commun*. **9**, 1188 (2018).
- 827 52. D. Mellacheruvu, Z. Wright, A. L. Couzens, J.-P. Lambert, N. A. St-Denis, T. Li, Y. V. Miteva,  
828 S. Hauri, M. E. Sardi, T. Y. Low, V. A. Halim, R. D. Bagshaw, N. C. Hubner, A. al-Hakim, A.  
829 Bouchard, D. Faubert, D. Fermin, W. H. Dunham, M. Goudreault, Z.-Y. Lin, B. G. Badillo, T.  
830 Pawson, D. Durocher, B. Coulombe, R. Aebersold, G. Superti-Furga, J. Colinge, A. J. R. Heck,  
831 H. Choi, M. Gstaiger, S. Mohammed, I. M. Cristea, K. L. Bennett, M. P. Washburn, B.

- 832 Raught, R. M. Ewing, A.-C. Gingras, A. I. Nesvizhskii, The CRAPome: a contaminant  
833 repository for affinity purification–mass spectrometry data. *Nat. Methods*. **10**, 730–736  
834 (2013).
- 835 53. P. Shannon, A. Markiel, O. Ozier, N. S. Baliga, J. T. Wang, D. Ramage, N. Amin, B.  
836 Schwikowski, T. Ideker, Cytoscape: a software environment for integrated models of  
837 biomolecular interaction networks. *Genome Res*. **13**, 2498–2504 (2003).
- 838 54. M. A. Kallio, J. T. Tuimala, T. Hupponen, P. Klemelä, M. Gentile, I. Scheinin, M. Koski, J. Käki,  
839 E. I. Korpelainen, Chipster: user-friendly analysis software for microarray and other high-  
840 throughput data. *BMC Genomics*. **12**, 507 (2011).

## 841 **Acknowledgements**

842 The MR1 tetramer technology was developed jointly by Dr. James McCluskey, Dr. Jamie Rossjohn,  
843 and Dr. David Fairlie, and the material was produced by the NIH Tetramer Core Facility as  
844 permitted to be distributed by the University of Melbourne. This study was supported by grants  
845 from Emil Aaltonen Foundation, Sigrid Juselius Foundation, Finnish Medical Foundation and  
846 Academy of Finland (grant 308913). The authors thank Tamas Bazsinka and Sini Miettinen for  
847 technical assistance.

848

849

850 Hetemäki designed and performed experiments, analyzed data, and wrote the original draft of  
851 the manuscript with Kekäläinen

852 Kaustio and Kinnunen designed and performed experiments, analyzed data, and contributed to  
853 writing and editing of the manuscript

854 Heikkilä, Keskitalo, Miettinen, Sarkkinen, Glumoff, Andersson, Kettunen, Vanhanen, Nurmi,  
855 Dunkel, Schlums and Kisand designed and performed experiments, analyzed data, and  
856 contributed to editing of the manuscript

857 Otava and Syrjänen acquired the samples and clinical data and contributed to editing of the  
858 manuscript

859 Eklund, Mäyränpää, Arstila, Bryceson, Peterson, Saarela, Varjosalo designed experiments,  
860 analyzed data, and contributed to editing of the manuscript

861 Kekäläinen coordinated the study, designed experiments, analyzed data, and wrote the original  
862 draft of the manuscript.

Fig 1

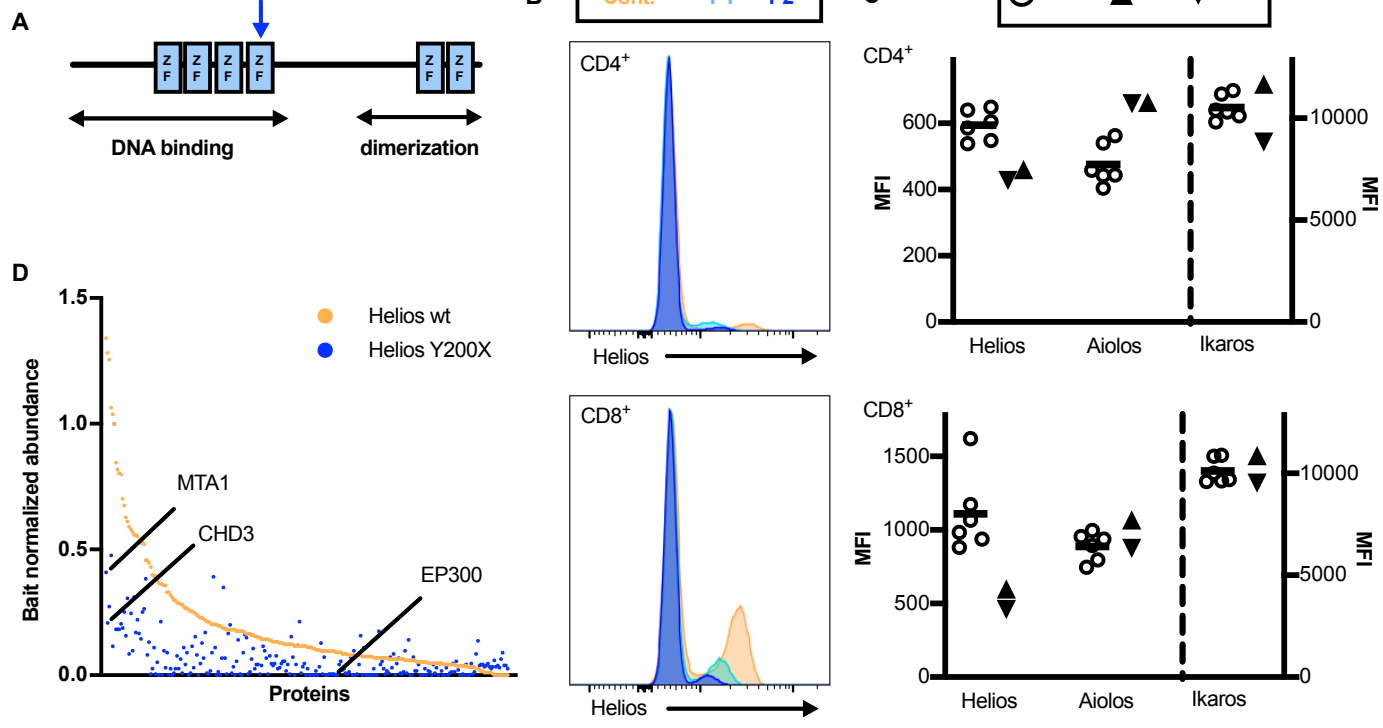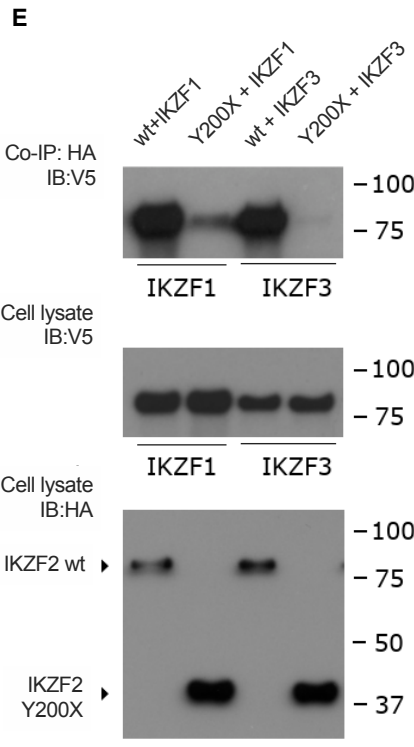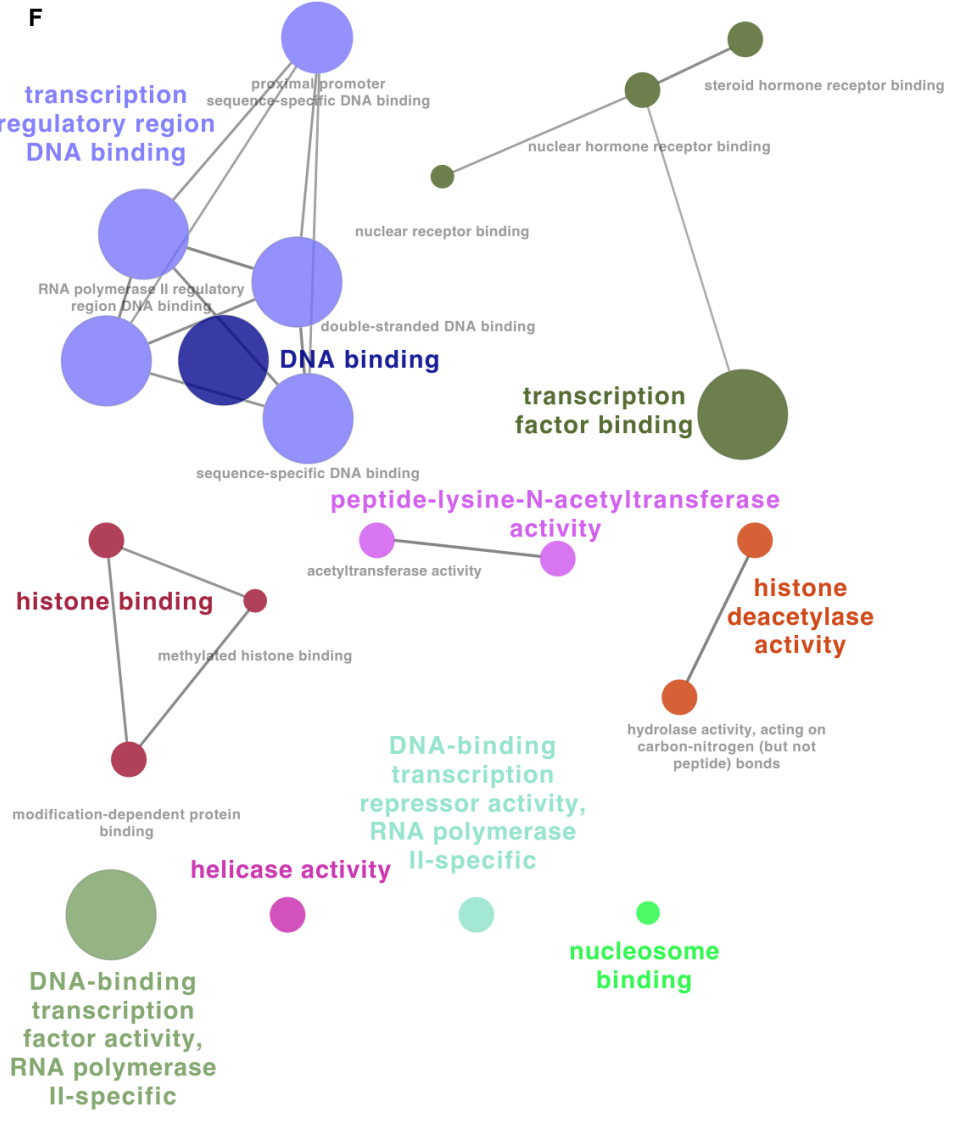

Fig 2

A

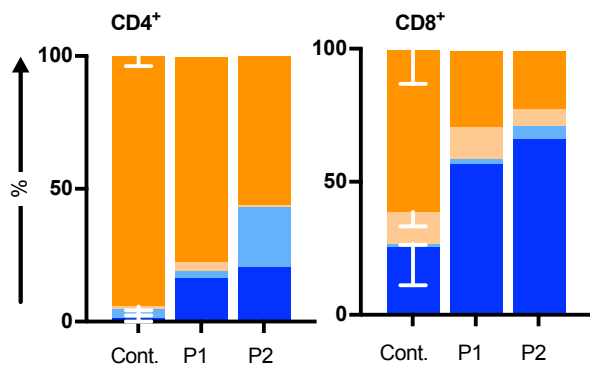

B

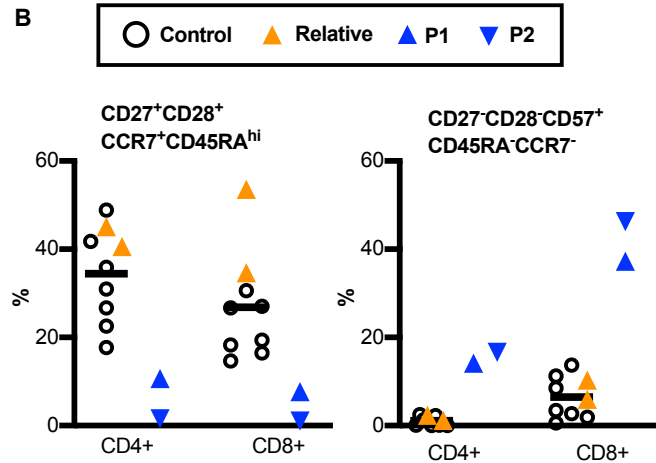

C

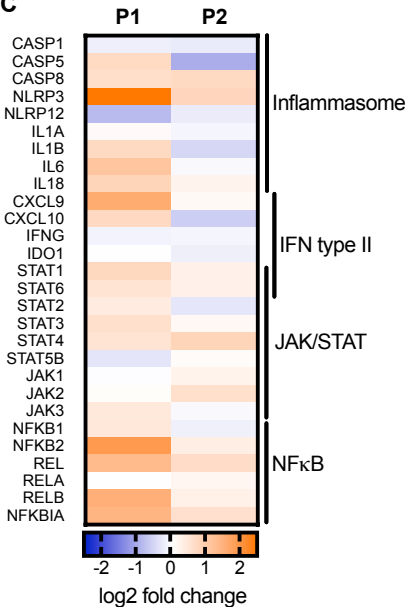

D

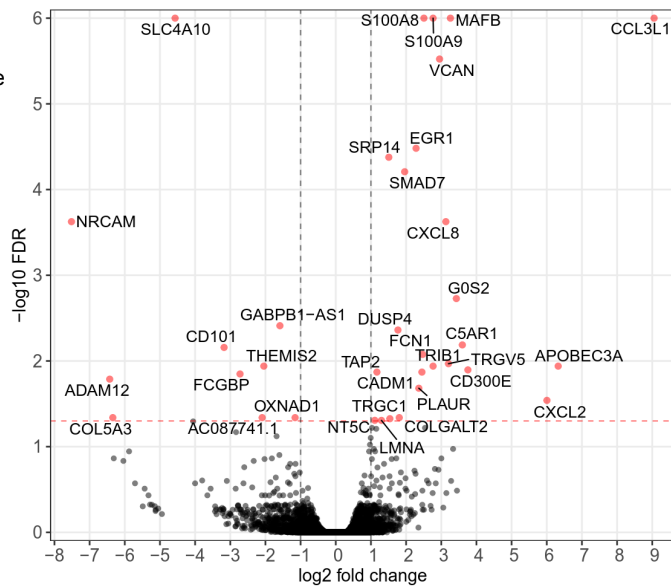

E

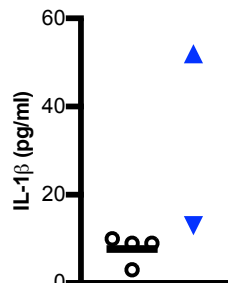



863 **Fig 1. Truncating variant of *IKZF2* disrupts the protein-protein interactions of HELIOS.**

864 (A) Schematic representation of HELIOS protein. Blue arrow indicates the Y200X variant. (B)  
865 HELIOS expression in CD4<sup>+</sup> and CD8<sup>+</sup> T cells in patients compared to healthy controls. Histograms  
866 with patients and representative healthy control and (C) fluorescence intensity (MFI) of  
867 transcription factors HELIOS, AIOLOS, and IKAROS for patients and healthy controls in CD4<sup>+</sup> and  
868 CD8<sup>+</sup> T cells are shown. (D) Abundance of protein partners of wild-type (wt) HELIOS' (orange) and  
869 variant Y200X (blue) HELIOS in interactome analysis. (E) A co-immunoprecipitation (Co-IP) assay  
870 displaying ability of HA tagged wild type HELIOS or variant Y200X HELIOS to form dimers with  
871 either IKAROS (IKZF1) or AIOLOS (IKZF3) tagged with V5. (F) The proteins whose protein-protein  
872 interactions were altered in Y200X compared to wild type HELIOS were selected and ClueGo  
873 clustering was performed to show the biological processes they were involved at. Cont.= control,  
874 P1=patient 1, P2=patient 2

875

876 **Fig 2. Chronically activated T cells in HELIOS haploinsufficient patients.**

877 (A) CD28 and CD27 expressing populations in patients and healthy controls is (n=6) is shown in  
878 CD4<sup>+</sup> and CD8<sup>+</sup> T cells, respectively. (B) Relative abundance of naive CD27<sup>+</sup>CD28<sup>+</sup>CD45RA<sup>+</sup>CCR7<sup>+</sup>  
879 cells and terminally differentiated CD27<sup>-</sup>CD28<sup>-</sup>CD57<sup>+</sup>CD45RA<sup>-</sup>CCR7<sup>-</sup> effector memory cells in  
880 patients and healthy controls and healthy relatives in CD4<sup>+</sup> and CD8<sup>+</sup> T cells, respectively. (C)  
881 Nanostring expression analysis of patients' PBMCs showing differentially expressed genes  
882 compared to healthy controls. Log2 fold change to age and sex matched healthy control is shown.  
883 (D) Volcano plot of results from EdgeR analysis of CD8<sup>+</sup> T cell 3'RNA-seq data. Orange dots  
884 represents genes showing significant (FDR<0.05) differential expression between patients and

Fig 3

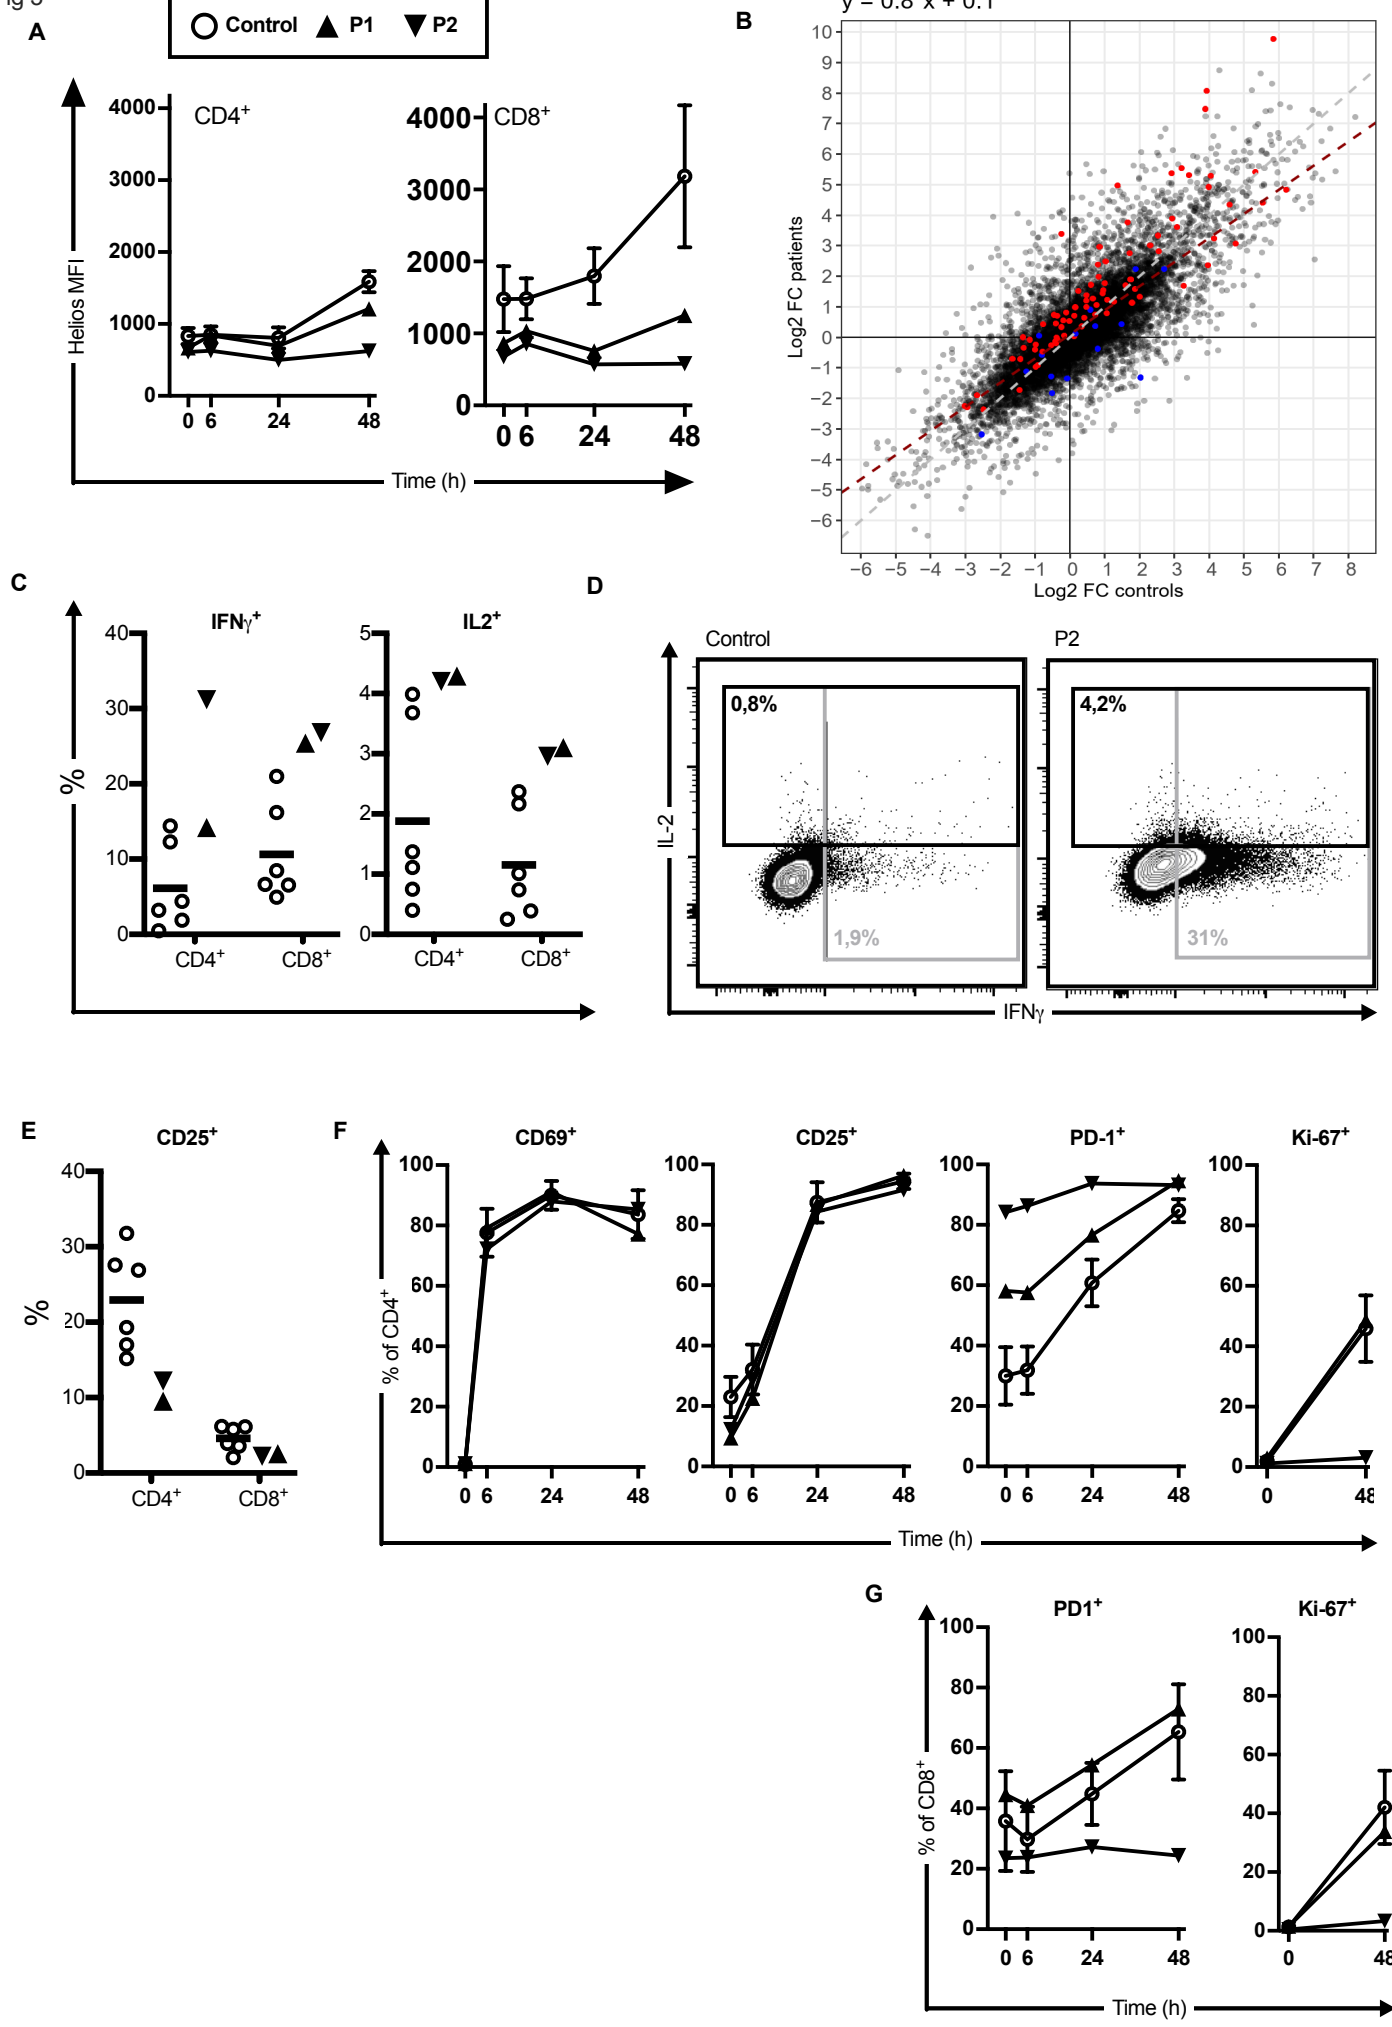

885 age and sex matched controls (n=3). (E) Levels of il-1 $\beta$  from culture supernatants containing  
886 unstimulated PBMC from patients and healthy controls, respectively. Cont.= control, P1=patient  
887 1, P2=patient 2

888

889 **Fig 3. TCR activation leads to increased proinflammatory response in HELIOS haploinsufficient**  
890 **T cells.**

891 (A) Expression of HELIOS CD4<sup>+</sup> and CD8<sup>+</sup> cells, respectively, after TCR stimulation with  
892 immobilized anti-CD3-CD28 antibodies in patients and healthy controls. (B) Correlation in CD3<sup>+</sup> T  
893 cell transcriptional regulation in response to 24 hour TCR stimulation between patients and  
894 healthy controls (n=5). Differential expression in unstimulated versus anti-CD3-CD28 stimulated  
895 cells and patients versus controls were analyzed from 3'RNA-seq data using EdgeR. Fitted linear  
896 regression is shown as a red dashed line (correlation coefficient 0.8) Genes found differentially  
897 upregulated or downregulated in patients versus controls in stimulated cells are marked in red  
898 and blue, respectively. (C) Percentage of both CD4<sup>+</sup> and CD8<sup>+</sup> T cells positive for IFN $\gamma$  and IL-2,  
899 respectively, in patients compared to healthy controls after TCR stimulation and (D) dot plot of  
900 IFN $\gamma$  and IL-2 expression in CD4<sup>+</sup> cells of healthy control and patient 2 are shown. (E) Expression  
901 of IL-2 receptor alpha chain CD25 in CD4<sup>+</sup> and CD8<sup>+</sup> T cells ex vivo. (F) Relative abundance of cells  
902 expressing CD69, CD25, PD1 or Ki-67 in CD4<sup>+</sup> T cells and (G) of cells expressing PD-1 or Ki-67 in  
903 CD8<sup>+</sup> T cells in patients and healthy controls after TCR stimulation. P1=patient 1, P2=patient 2,  
904 (black triangles), MFI=mean fluorescence intensity. Controls = open circles.

905

906 **Fig 4. HELIOS haploinsufficient Tregs are activated and produce proinflammatory cytokines.**

Fig 4

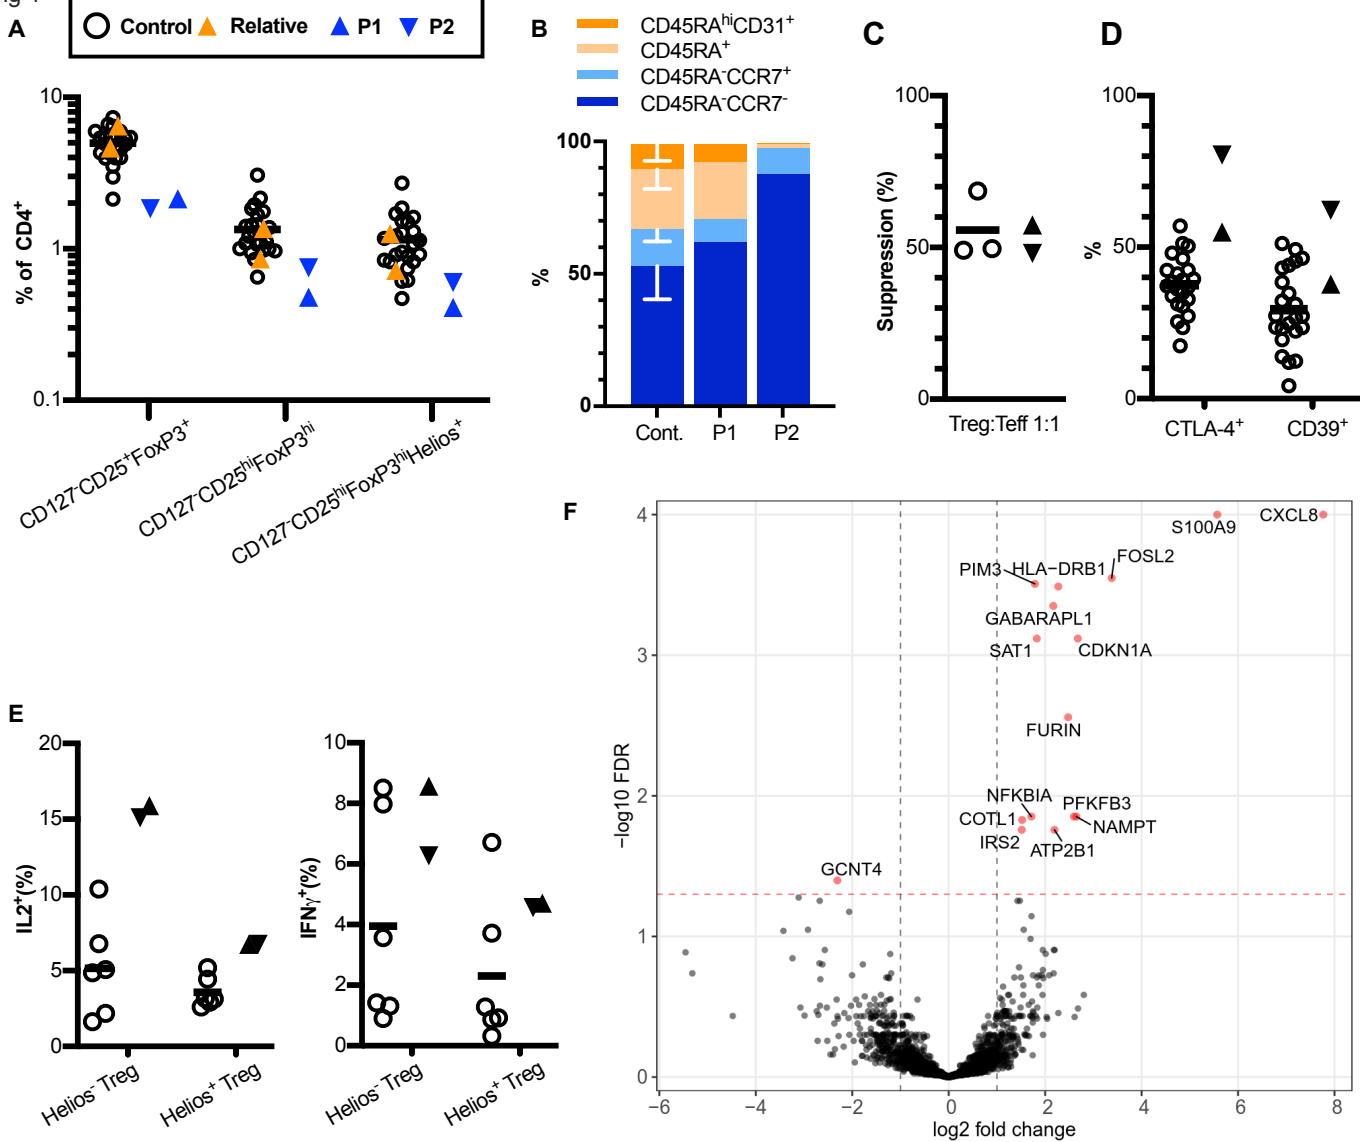

Fig 5

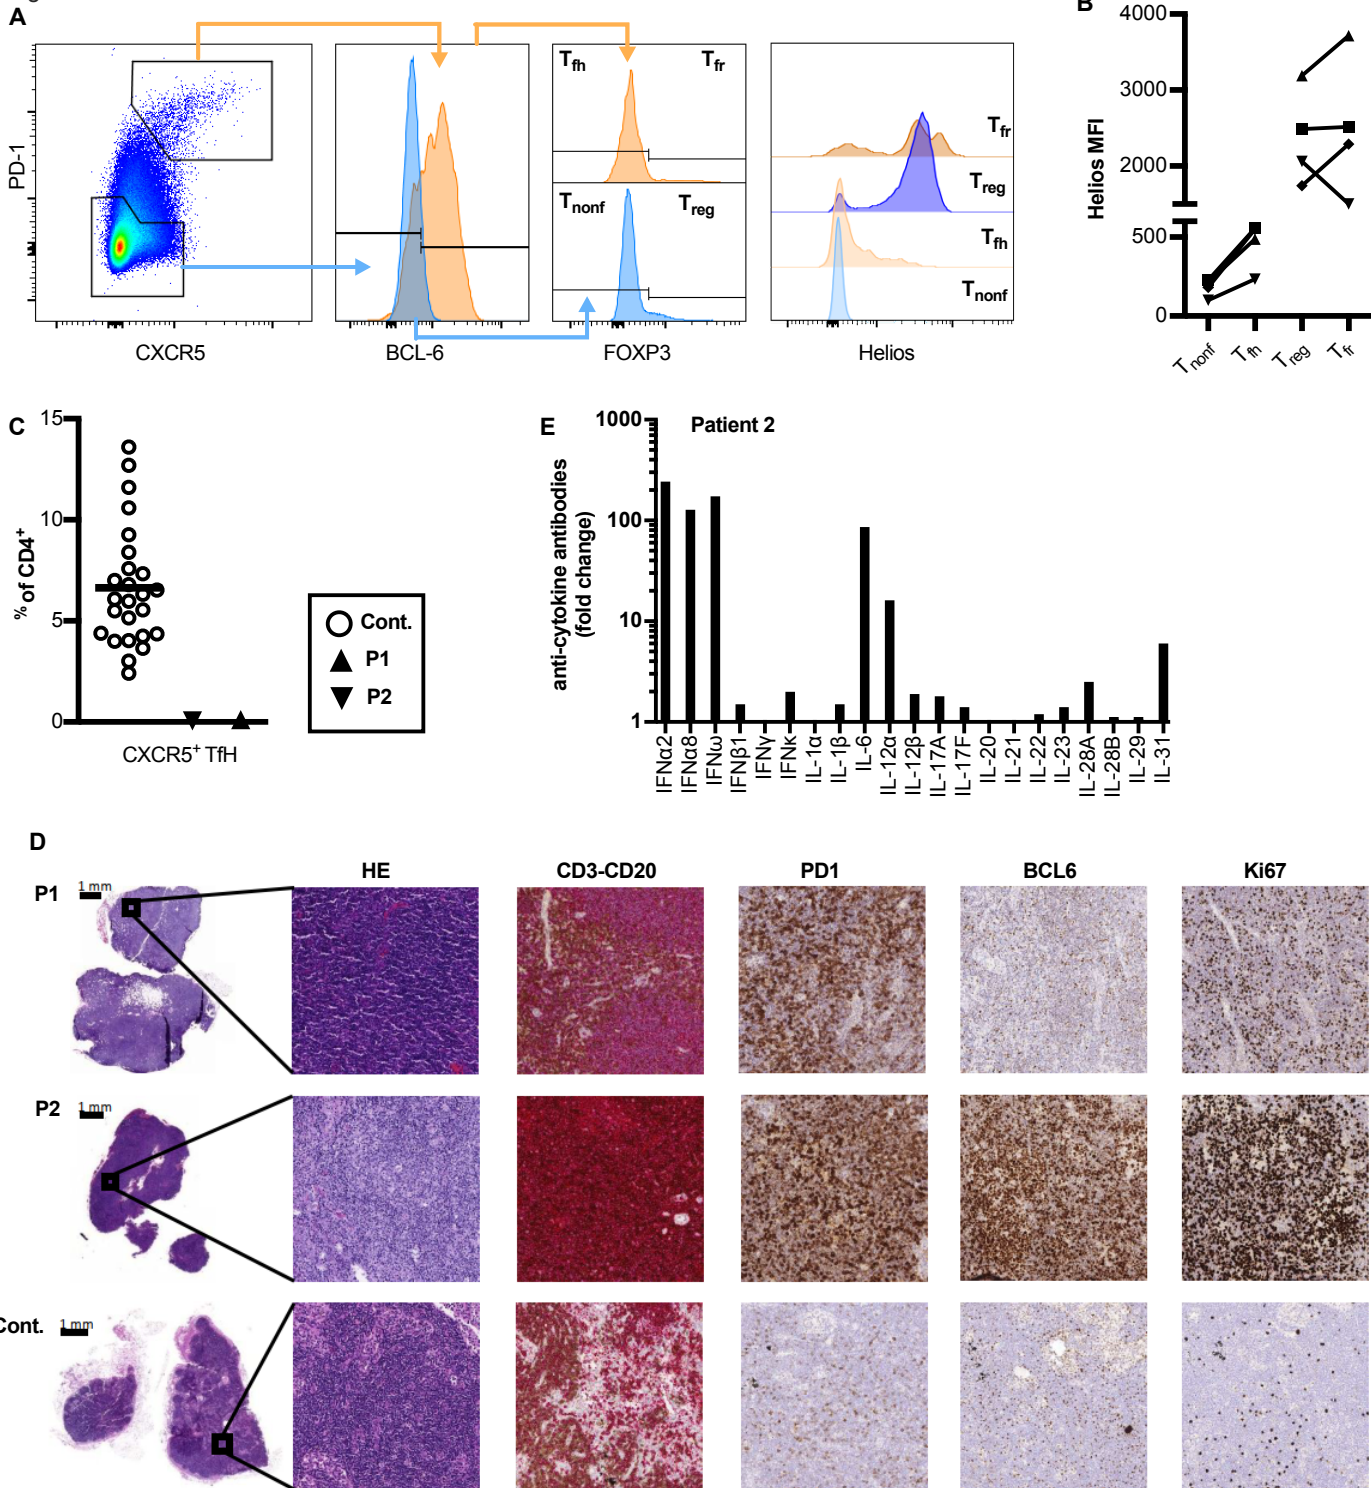

907 (A) Proportion of regulatory T cells (Treg) of CD4<sup>+</sup> cells gated as CD127<sup>-</sup>CD25<sup>+</sup>FOXP3<sup>+</sup> to include  
908 also naive cells, CD127<sup>-</sup>CD25<sup>hi</sup>FOXP3<sup>hi</sup> or CD127<sup>-</sup>CD25<sup>hi</sup>FOXP3<sup>hi</sup>HELIOS<sup>+</sup> in patients, healthy  
909 relatives and healthy controls. (B) Relative abundance of recent thymic emigrant CD45RA<sup>hi</sup>CD31<sup>+</sup>,  
910 naive CD45RA<sup>+</sup>, and memory CD45<sup>-</sup>CCR7<sup>+</sup> and CD45RA<sup>-</sup>CCR7<sup>-</sup> cells in CD127<sup>-</sup>CD25<sup>+</sup>FOXP3<sup>+</sup> Tregs  
911 in patients and healthy controls. (C) The suppression assay showing suppressive capacity of Tregs  
912 of patients and of healthy controls. (D) Expression of CTLA-4 and CD39 in CD127<sup>-</sup>CD25<sup>+</sup>FOXP3<sup>+</sup>  
913 Tregs in patients and healthy controls. (E) Portion of IL-2<sup>+</sup> and IFN $\gamma$ <sup>+</sup> cells, respectively, in both  
914 HELIOS<sup>-</sup> and HELIOS<sup>+</sup> Treg subsets in patients and healthy controls after overnight stimulation  
915 with immobilized anti-CD3-CD28 antibodies. (F) Volcano plot showing differentially expressed  
916 genes (orange dots) between patients and healthy controls from EdgeR analysis of 3'RNA-seq  
917 data from purified CD4<sup>+</sup>CD25<sup>hi</sup>CD127<sup>-</sup> Tregs.

918

919 **Fig 5. Accumulation of Tfh cells in the perifollicular areas of lymph nodes.**

920 (A) HELIOS expression in lymph node CD3<sup>+</sup>CD4<sup>+</sup> T cell was analyzed in FOXP3<sup>-</sup>CXCR5<sup>low</sup>PD1<sup>low</sup>BCL-  
921 6<sup>-</sup> T non-follicular helper (Tnonf), CD4<sup>+</sup>FOXP3<sup>-</sup>CXCR5<sup>hi</sup>PD1<sup>hi</sup>BCL-6<sup>+</sup> T follicular helper (Tfh),  
922 CD4<sup>+</sup>FOXP3<sup>+</sup>CXCR5<sup>low</sup>PD1<sup>low</sup>BCL-6<sup>-</sup> T non-follicular regulatory (Treg) and  
923 CD4<sup>+</sup>FOXP3<sup>+</sup>CXCR5<sup>hi</sup>PD1<sup>hi</sup>BCL-6<sup>+</sup> T follicular regulator (Tfr) cells. Gating strategy in a healthy  
924 control and (B) mean fluorescence intensity (MFI) of HELIOS for four individual donors is shown. (C)  
925 Frequency of CD4<sup>+</sup> T cells expressing follicular homing receptor CXCR5<sup>+</sup> in PBMCs of patients and  
926 healthy controls. (D) Histological analysis of patients' lymph nodes showing follicular hyperplasia  
927 in the perifollicular region around the germinal centers. A more detailed immunohistochemistry  
928 staining of accumulated cells expressed with Tfh markers Bcl6 and PD-1 and Ki-67 indicating

Fig 6

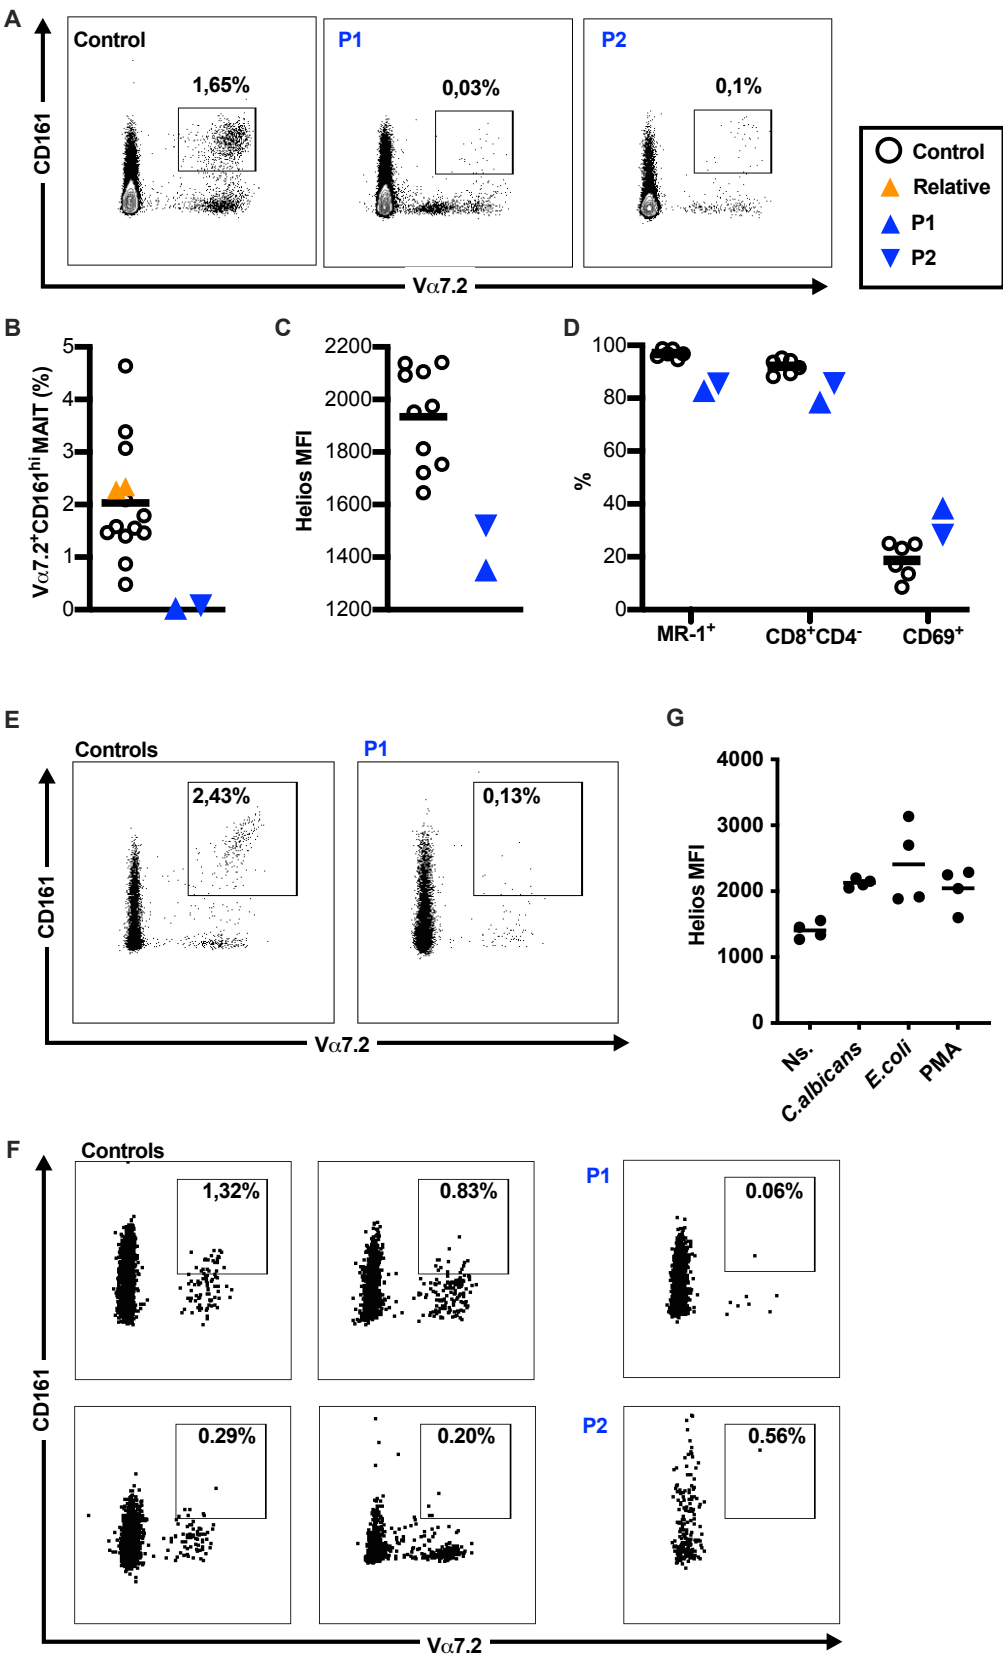

929 proliferation activity. (E) Auto-antibodies against cytokines in patient 2. Fold change compared  
930 to mean of healthy controls (n=5) is shown. Cont.= control, P1=patient 1, P2=patient 2

931

932 **Fig 6. Reduction of circulating MAIT cells.**

933 (A) Dot plots showing abundance of V $\alpha$ 7.2<sup>+</sup>CD161<sup>+</sup> MAITs in the CD3<sup>+</sup> T cells from peripheral  
934 blood in patients and representative healthy control and (B) their frequency in CD3<sup>+</sup> T cells in  
935 patients, healthy relatives and healthy controls. (C) Mean fluorescence intensity (MFI) of HELIOS  
936 in MAITs. (D) Abundance of MR1<sup>+</sup>, CD4<sup>-</sup>CD8<sup>+</sup> and CD69<sup>+</sup> cells, respectively, in MAITs in patients  
937 and healthy controls. (E) Frequency MAITs in colon and (F) in duodenum samples obtained from  
938 patients and organ donors without any chronic inflammatory conditions. (G) HELIOS expression  
939 in MAITs from PBMC in response to stimulation with *E. coli*, *Candida albicans* or PMA.

940

941 **Table 1. Clinical presentation and immunological phenotype of patients with the *IKZF2* p.Y200X**  
942 **variant**



|                                                             | 1     | 2      | Reference values (unit) |
|-------------------------------------------------------------|-------|--------|-------------------------|
| Sex                                                         | F     | M      |                         |
| <b>Clinical features</b>                                    |       |        |                         |
| Aphthous ulcers (vaginal/oral)                              | x     | x      |                         |
| Thrush (oral/vaginal)                                       | x     | x      |                         |
| Recurrent respiratory infections                            | x     | x      |                         |
| Hypothyreosis                                               | x     | x      |                         |
| Vitiligo                                                    | x     |        |                         |
| Lichen                                                      |       | x      |                         |
| Lymphadenopathy                                             | x     | x      |                         |
| Lymphoma                                                    |       | x      |                         |
| <b>Lymphocytes</b> (% of leukocytes)                        | 23    | 18     | <b>(% of parent)</b>    |
| T cells                                                     | 74    | 51     | 66-88                   |
| CD4+                                                        | 55    | 48     |                         |
| CCR7+CD45RA+ naive                                          | 23    | 3      | 21-55                   |
| CCR7+CD45RA- central memory                                 | 50    | 35     | 8-33                    |
| CCR7-CD45RA- effector memory                                | 24    | 55     | 20-52                   |
| CCR7-CD45RA+ effector memory RA+                            | 3     | 8      | 1-17                    |
| CD38+HLADR+ activated                                       | 7     | 9      | 1-5                     |
| CD31+CD45RA+ recent thymic emigrant                         | 11    | 0,4    | 14-38                   |
| CD8+                                                        | 42    | 50     |                         |
| CCR7+CD45RA+ naive                                          | 16    | 2      | 19-71                   |
| CCR7+CD45RA- central memory                                 | 11    | 4      | 1-7                     |
| CCR7-CD45RA- effector memory                                | 29    | 54     | 15-63                   |
| CCR7-CD45RA+ effector memory RA+                            | 44    | 40     | 4-34                    |
| CD38+HLADR+ activated                                       | 29    | 22     | 1-22                    |
| CD31+CD45RA+ recent thymic emigrant                         | 12    | 0,5    | 17-65                   |
| TCRgd                                                       | 1,4   | 0,7    | 2-12                    |
| TCRab+CD4-cd8-                                              | 1,4   | 0,2    | 3-9                     |
| NK cells                                                    | 10    | 33     | 4-25                    |
| B cells                                                     | 16    | 15     | 6-19                    |
| CD27-IgD+ naive                                             | 78    | 85     | 43-82                   |
| CD27+IgD+ unswitched memory                                 | 16,9  | 4,5    | 7,2-31                  |
| CD27+IgD- class-switched memory                             | 1,9   | 8,4    | 6,5-29                  |
| CD38 <sup>low</sup> CD21 <sup>low</sup> CD21 <sup>low</sup> | 18,8  | 2,9    | 1,1-6,9                 |
| CD38 <sup>+++</sup> IgM <sup>++</sup> transtitional         | 7,7   | 11     | 0,6-3,5                 |
| CD38 <sup>+++</sup> IgM- plasmablast/-cell                  | 0     | 1,2    | 0,4-3,6                 |
| <b>Antibody levels</b>                                      |       |        | <b>(g/l)</b>            |
| IgG                                                         | 4,32  | 10,16  | 6,77-15,0               |
| IgG1                                                        | 3,6   | 7,48   | 5,2-12,7                |
| IgG2                                                        | 0,64  | 1,84   | 1,43-5,6                |
| IgG3                                                        | 0,17  | 0,19   | 0,11-0,85               |
| IgG4                                                        | <0,02 | 0,0003 | 0,03-2                  |
| IgM                                                         | 0,22  | 1,82   | 0,88-4,84               |
| IgA                                                         | 0,59  | 0,69   | 0,36-2,59               |
| IgE                                                         | 3     | <1     | <1                      |
| Vaccine responses                                           | low   | normal |                         |

943 **Supplementary Materials:**

944

945 Supplementary Figure 1: Targeted capillary sequencing of *IKZF2* and gating strategy to measure  
946 IKAROS family transcription factors

947 Supplementary Figure 2: Gating strategy to measure different T and B cell maturation phases and  
948 HELIOS quantification in them

949 Supplementary Figure 3: Inflammasome activation in patients with the *IKZF2* p.Y200X variant

950 Supplementary Figure 4: Gating strategy and volcano plots of T cell activation experiments

951 Supplementary Figure 5: Gating strategy to regulatory T cell experiments

952 Supplementary Figure 6: Gating strategy to follicular T helper cell quantification and auto-  
953 antibodies in patient 1

954 Supplementary Figure 7: NK cell phenotype in patients with the *IKZF2* p.Y200X variant

955 Supplementary Figure 8: Gating strategy to MAIT experiments

956

957 Supplementary Table 1: Whole exome sequencing and filtration of data

958 Supplementary Table 2: Protein-protein interactions of HELIOS identified in biotin proximity  
959 ligation and ClueGo clustering of the results

960 Supplementary Table 3: List of differentially expressed genes in different RNAseq conditions

961 Supplementary Table 4: Pathway analysis of RNAseq data through IPA

962 Supplementary Table 5: Supplementary list of reagents

### Supplementary Clinical Data

Patient 1 is a woman that was admitted to immunodeficiency clinic at her late 30s. He had suffered from recurrent *Candida albicans* vulvovaginitis with painful genital ulcerations for appr. 10 years before admission. The patient has had occasional aphthae also in her mouth and recurrent sinusitis. The diagnosis of common variable immunodeficiency was made and hypothyreosis diagnosis a year after that. The same year, some round, mildly enlarged lymph nodes were found in the right armpit and under the right pectoralis major muscle, histology showed cortical follicular hyperplasia. Immunoglobulin replacement therapy was started two years after the diagnosis: with a weekly dose of 30–40 ml the situation got significantly better and yeast infection relapses are now rare. After initiation of the immunoglobulin replacement therapy, she had a herpes zoster infection in the left chest area and she had two sinusitis with continuous sensation of nasal fullness. Weekly SCIG dose elevation to 60 ml did not help and antrostomy (FESS) on both sides was performed. While on SCIG, patient has been treated succesfully for *Helicobacter pylori*. Fecal parasites were examined due to persistent diarrhea and *Dientamoeba fragilis* was found and treated. Diarrhea persisted after succesfull eradication and a colonoscopy was made with normal macroscopic and histological findings.

Patient 2 is a relative of Patient 1 and he was examined at the immunodeficiency clinic first time at his 60s. During his working years, he had approximately two pneumonias yearly, after he has been examined for immunodeficiency he had one radiologically confirmed pneumonia two years ago. He has had a mild wound infection twice after surgery. Lichen planus of the upper extremities and gluteal area has reappeared over the years. At his 30s, Morbus Hodgkin was diagnosed in a lymph node of the left armpit. The lymphoma was treated with splenectomy and radiation therapy that resulted in hypothyreosis and mild fibrosis of the lungs, for which he uses intermittent glucocorticoid inhalations and gets occasional oral candidiasis. 16 years later, an enlarged lymph node was removed from the right inguinal area, histology showed lymphatic hyperplasia. *Helicobacter pylori* has been cleared with antibiotics. The patient has always had loose stools several times a day, colonoscopy two years after diagnosis showed mild irritation of the ileum but histology was normal.

| Clinical findings           | patient 1 | patient 2     |
|-----------------------------|-----------|---------------|
| <b>Viral infections</b>     |           |               |
| Aphtae                      | x         | x             |
| HSV                         | ~         | ~             |
| VZV (zoster)                | x         | I             |
| HPV high risk               | ~         | (-)           |
| CMV                         | ~         | I             |
| <b>Bacterial infections</b> |           |               |
| Recurrent sinusitis         | x         | ~             |
| Recurrent pneumonia         | ~         | x             |
| Surgical wound infection    | ~         | x             |
| HePy                        | x         | x             |
| <b>Yeast infections</b>     |           |               |
| Mouth                       | ~         | x             |
| Candida vaginitis           | x         | (-)           |
| <b>Parasitic infections</b> |           |               |
| Dientamoeba fragilis        | x         | ~             |
| Giardia                     | ~         | ~             |
| <b>Autoimmunity</b>         |           |               |
| Vitiligo                    | x         | ~             |
| Lichen                      | ~         | x             |
| Colitis                     | ~         | x             |
| Hypothyreosis               | x         | x             |
| <b>Lymphatic tissue</b>     |           |               |
| Follicular hyperplasia      | x         | x             |
| Lymphoma                    | ~         | x             |
| Splnectomy                  | ~         | x             |
| <b>Vaccine responses</b>    |           |               |
| StPn polysaccharide         | 4/10      | N             |
| StPn conjugate              | 2/9       | N             |
| Menigococcus                | (-)       | N             |
| Tetanus                     | low       | N             |
| Diphtheria                  | low       | N             |
| Measles                     | low       | I             |
| Rubella                     | N         | I             |
| Parotitis                   | N         | I             |
| Hib                         | (-)       | N             |
| HBV                         | low       | (-)           |
| HAV                         | N         | (-)           |
| <b>Other</b>                |           |               |
| C3                          | 1.47 low  | 1.36 / N      |
| Monosytosis                 | N         | 0.81-0.92/12% |
| Interferon1 autoAb          | N         | elevated      |
| Plasma IL2R                 | 535 N     | 201 N         |

HSV - Herpes simplex virus, S- HSVAb neg and no symptoms

VZV - Varicella zoster virus, zoster symptoms and VZV-IgG pos (patient 1), no symptoms and VZV-IgG pos (patient 2)

HPV - Human papilloma virus, high risk subgroups, PCR from cervix

CMV - P-CMVNh neg Patient 1

HePy - Helicobacter pylori, fecal antigens

StPn - Streptococcus pneumoniae

Hib - Hemophilus influenzae

HBV - Hepatitis B virus

HAV - Hepatitis A virus

|~ - negative findings

x - positive findings

(-) - not measured

N - normal findings

I - natural immunity: positive IgG, no IgM

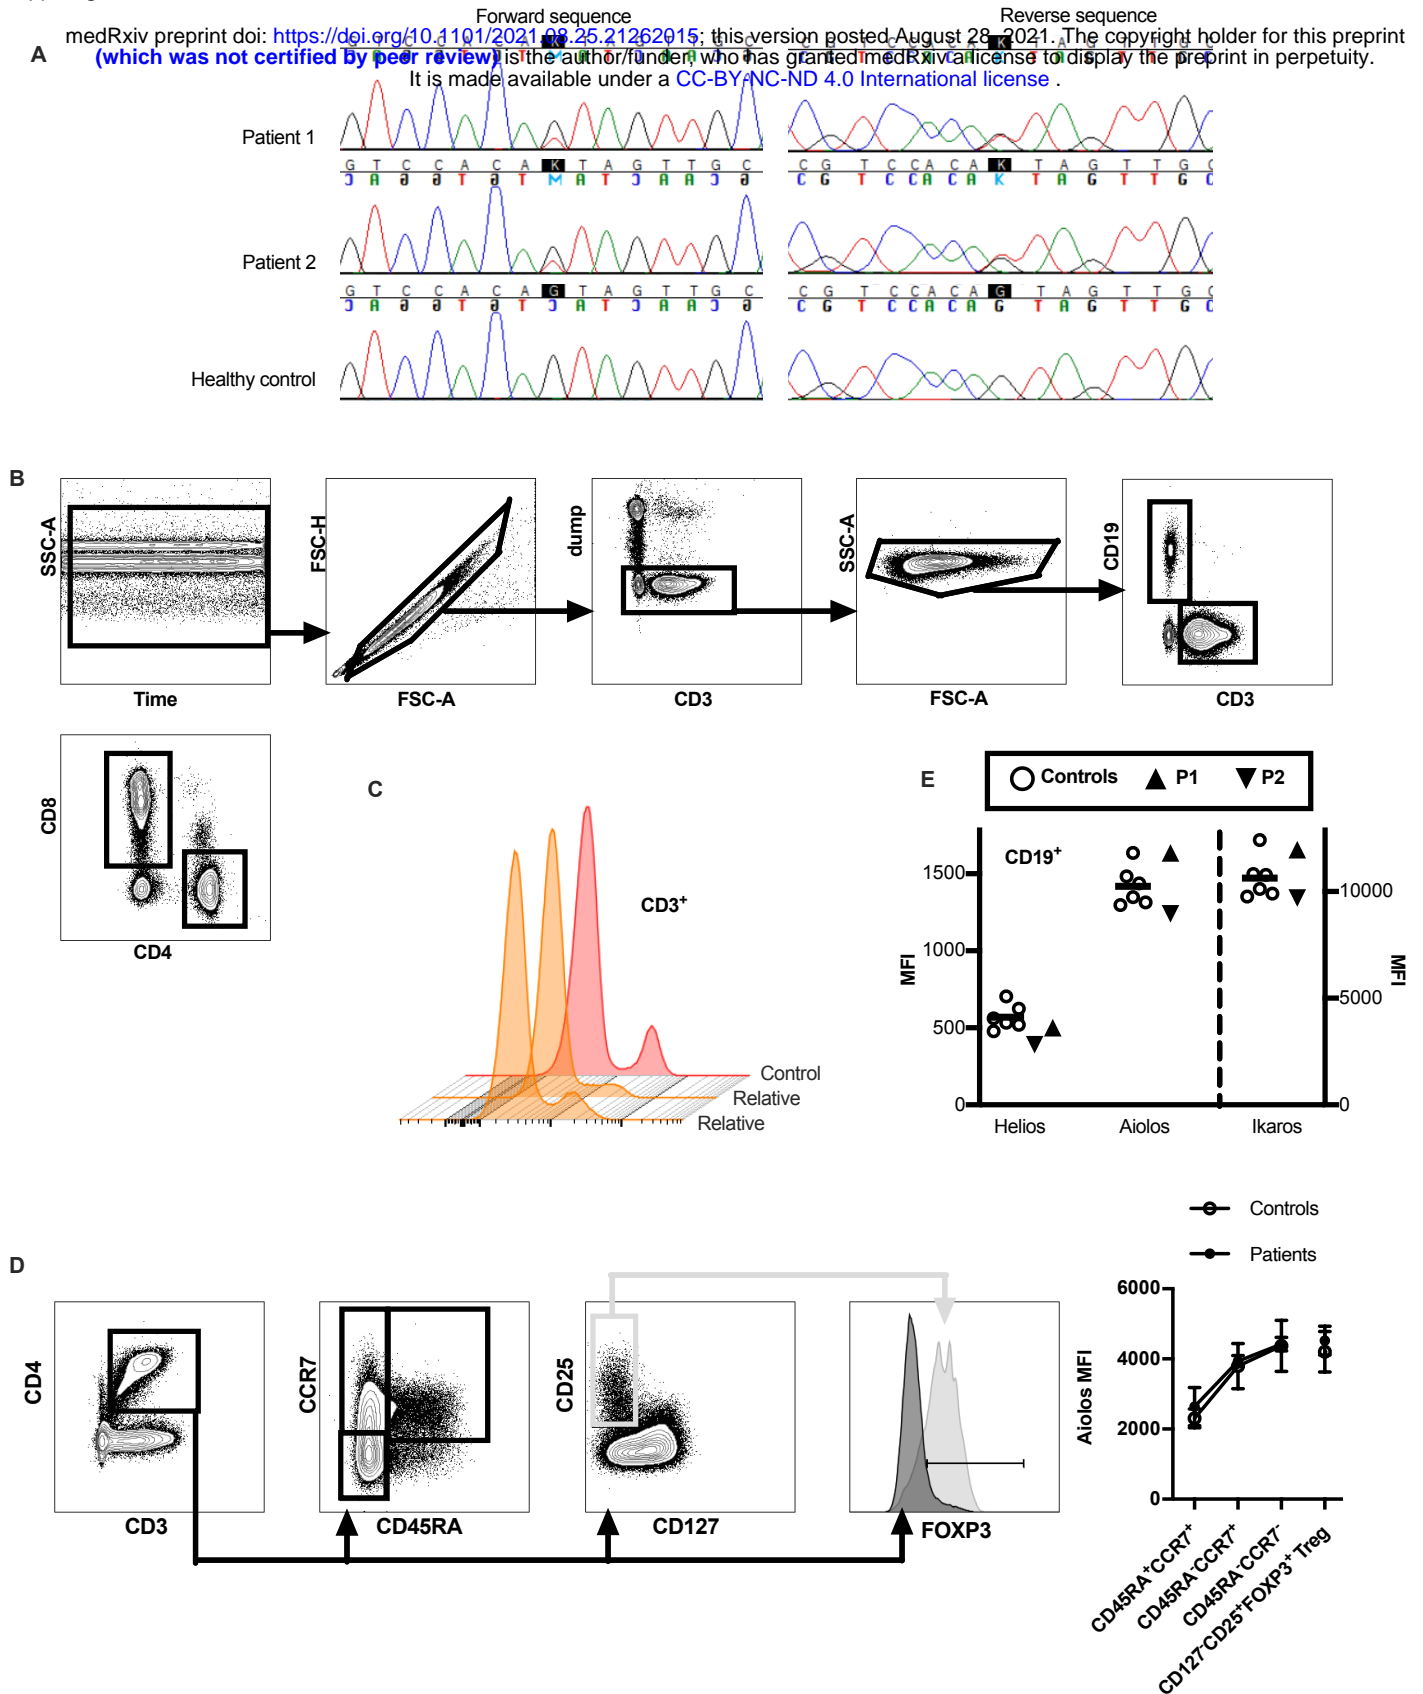

### Supplementary Figure 1

(A) Targeted capillary sequencing of cDNA derived from the RNA of patients and a healthy control, respectively. (B) Gating strategy to identify B cells, CD4+ T cells and CD8+ T cells from peripheral blood to calculate mean fluorescence intensity for transcription factors HELIOS, AIOLOS and IKAROS. CD19+CD3- B cells and CD19-CD3+ T cells were gated from live CD14- lymphocytes. CD4+CD8- and CD8+CD4- T cells were further identified from the T cell population. (C) Histogram showing HELIOS expression in two healthy relatives of patients and representative unrelated healthy control. (D) Gating strategy and mean AIOLOS MFI in patients compared to healthy controls (n=6) when examining AIOLOS expression in different subpopulations of CD4+ cells. Gating strategy is shown for a healthy male control (A, D). (E) Mean fluorescence intensity (MFI) for transcription factors in CD19+ B cells. Expression in CD4+ and CD8+ T cells is shown Fig 1C. P1=patient 1, P2=patient 2, (black triangles). Dump = dead cell marked, CD14.

Suppl Fig 2

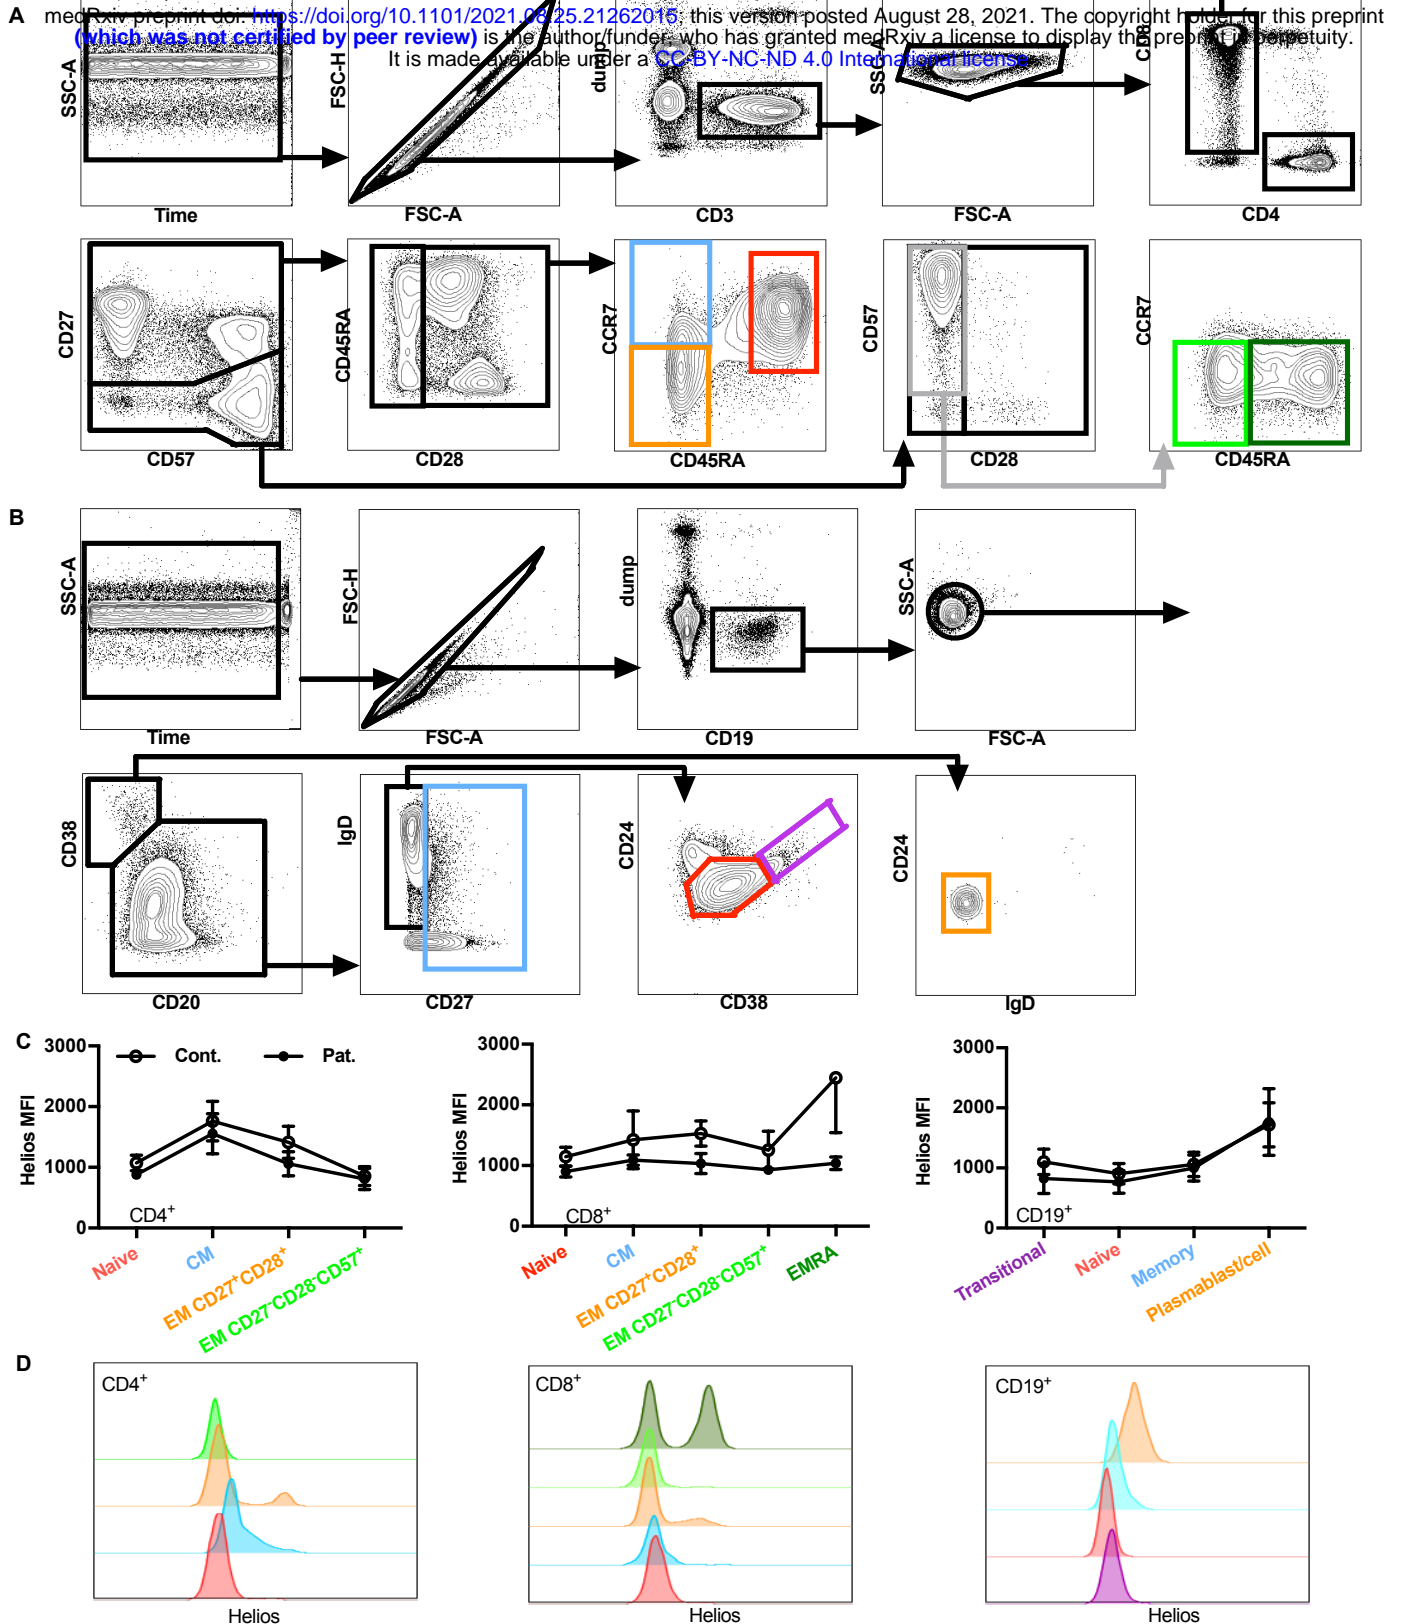

**Supplementary Figure 2**

(A) Gating strategy to identify T and B cell maturation phases from peripheral blood and to measure their HELIOS expression. CD4+CD8- and CD8+CD4- T cells were gated from live CD14-CD19-CD3+ cells. These populations were divided by the expression of CD27 and CD28. CD27+CD28+CCR7+CD45RAhi naive (red) CD27+CD28+CCR7+CD45RA- central memory (blue), CD27+CD28+CCR7-CD45RA- effector memory (orange), CD27-CD28-CCR7-CD45RA-CD57+ effector memory (light green) and CD27-CD28-CCR7-CD45RA+CD57+ effector memory RA+ (dark green) cells were identified. Gating strategy in CD8+ cells is shown for a healthy male control. This gating strategy was also utilized to identify T cell populations depicted in Fig 2A&B. Dump = dead cell marked, CD19, CD14. (B) Cells of B cell lineage were identified as live CD3-CD14-CD19+ cells. Transitional B cells were defined CD20+CD27-IgD+CD38hiCD24hi (violet), naive B cells CD20+CD27-IgD+CD38medCD24med (red) and memory B cells CD20+CD27- (blue). Plasma cells and -blasts were CD20-Cd38hiCD24-IgD- (orange). Gating strategy is shown for a healthy female control. Dump = dead cell marked, CD14, CD3. (C) Mean fluorescence intensity of HELIOS in respective lymphocyte populations in healthy controls (n=6) and patients. (D) Histograms depicting HELIOS expression in respective lymphocyte populations in a representative healthy control.

Suppl Fig 3

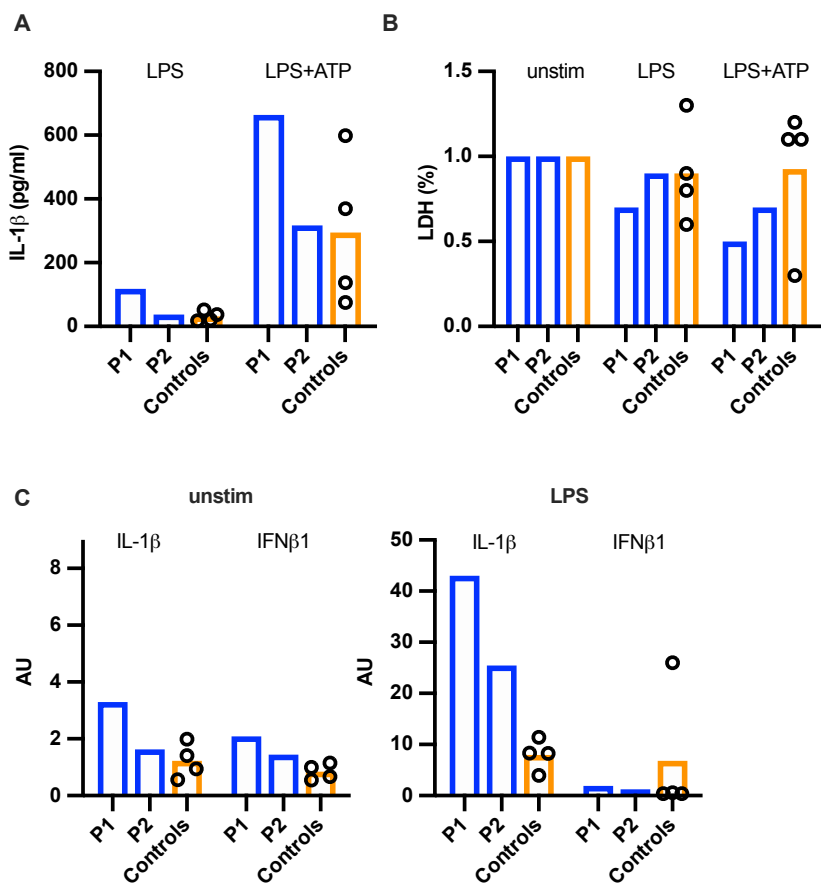

**Supplementary Figure 3**

(A) PBMC of patients and healthy controls (n=4) were stimulated with LPS or combination of LPS and ATP, and il-1 $\beta$  and (C) lactate dehydrogenase (LDH) were measured from culture supernatants. (D) Expression of il-1 $\beta$  and IFN $\beta$ 1 were measured by quantitative PCR from PBMC without or with LPS stimulation. P1=patient 1, P2=patient 2.

Suppl Fig 4

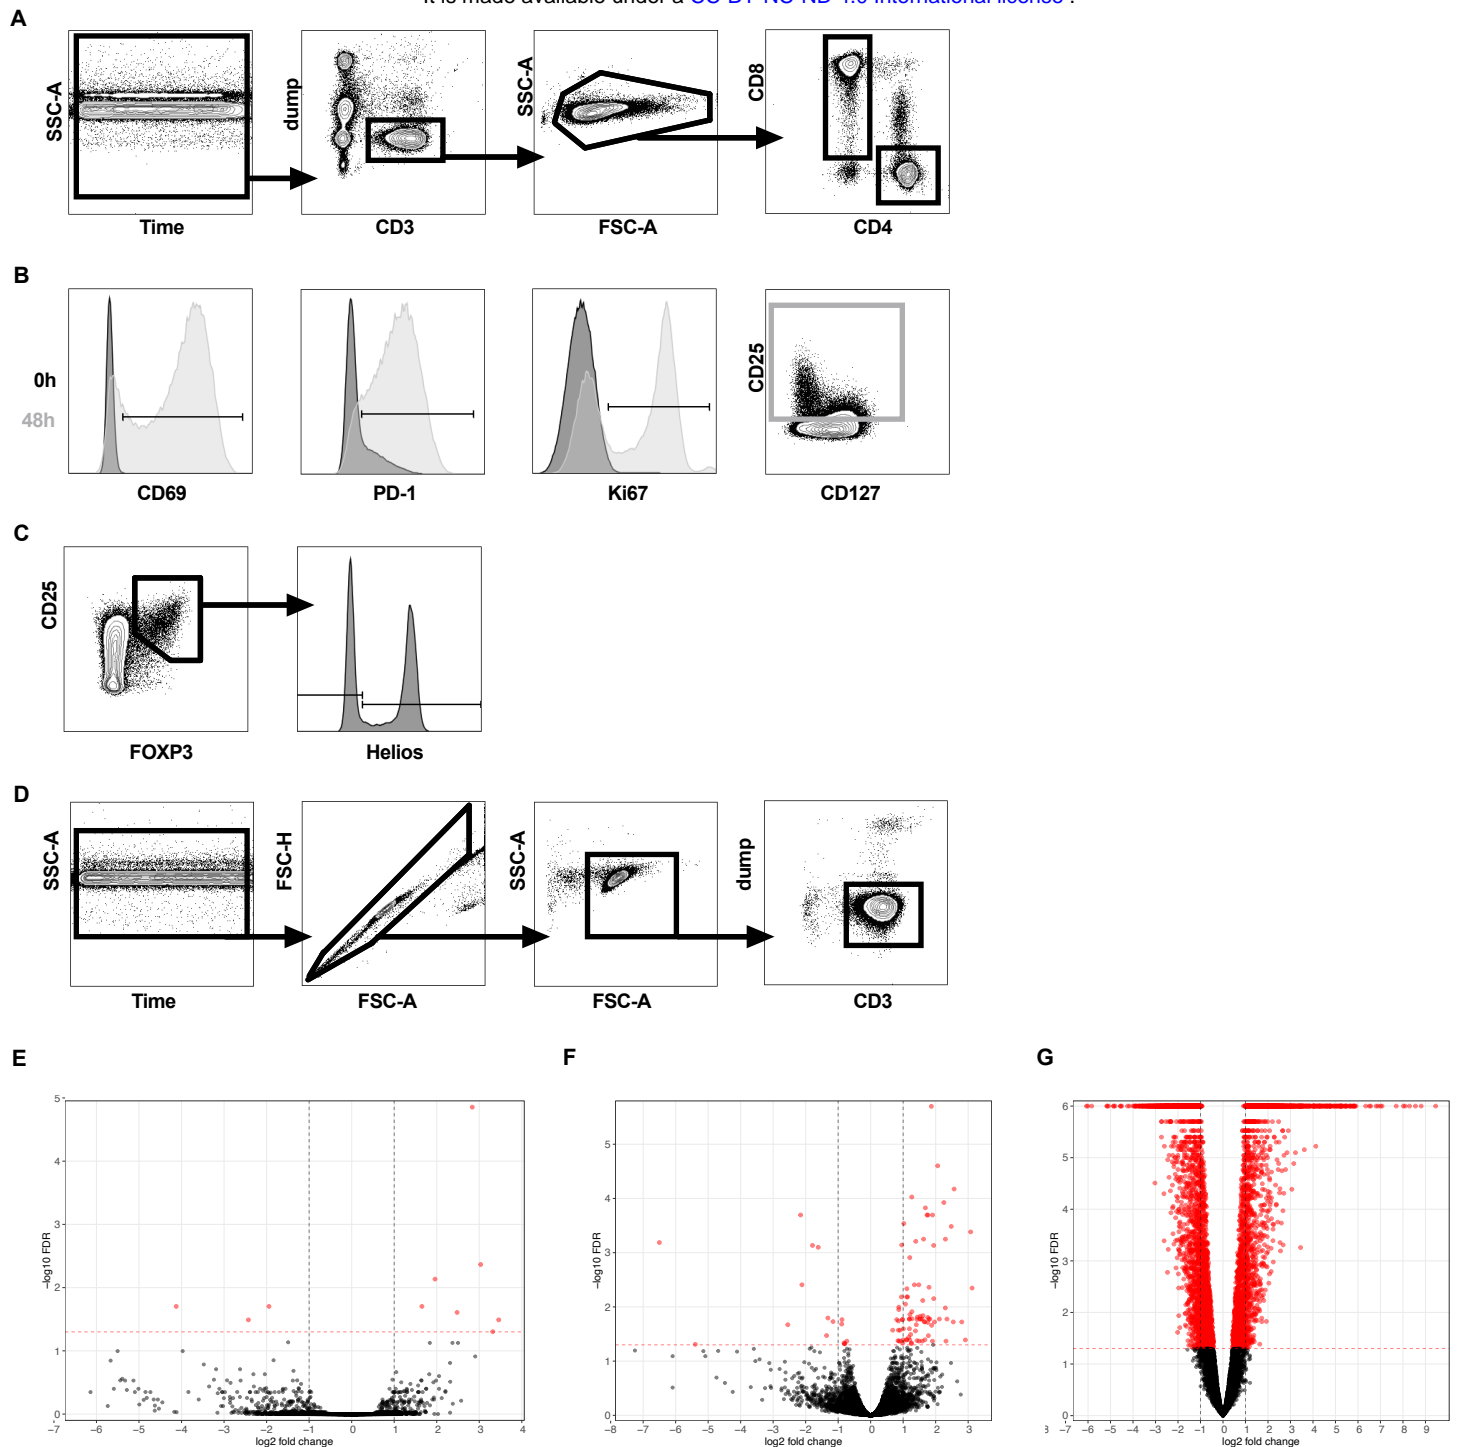

**Supplementary Figure 4**

(A) Gating strategy to evaluate changes in activation markers and in cytokine production after stimulation with anti-CD3 and anti-CD28 antibodies. From live CD19-CD14-CD3<sup>+</sup> lymphocytes with CD4<sup>+</sup>CD8<sup>-</sup> and CD4<sup>-</sup>CD8<sup>+</sup> T cells were identified. Doublet discrimination was not performed as this would have resulted to unwanted exclusion of stimulated dividing cells. (B) Expression of CD69, PD-1 and Ki67 was measured in different time points, here expression in CD4<sup>+</sup>CD8<sup>-</sup> cells ex vivo (black) and after 48h of stimulation (light gray) is shown. (C) In different flow cytometry panel CD4<sup>+</sup>CD8<sup>-</sup> cells were identified with identical gating strategy as in A and CD25<sup>hi</sup>FOXP3<sup>hi</sup>HELIOS<sup>-</sup> or HELIOS<sup>+</sup> cells were gated. IL-2 and IFN expression was then measured as shown in Fig 3D. (D). Additionally, the purity of CD3<sup>+</sup> T cells was evaluated after bead purification. Gating strategy is shown with samples from a healthy female control (A-D). (E) Volcano plot of differentially expressed genes (red dots) in patients compared to healthy controls (n=5) in 3'RNA-seq data from purified CD3<sup>+</sup> T cells without or (F) with anti-CD3-CD28 stimulation. (G) Volcano plot showing differentially expressed genes in anti-CD3-CD28 stimulated cells compared to unstimulated cells. Dump = dead cell marked, CD19, CD14.



Suppl Fig 5

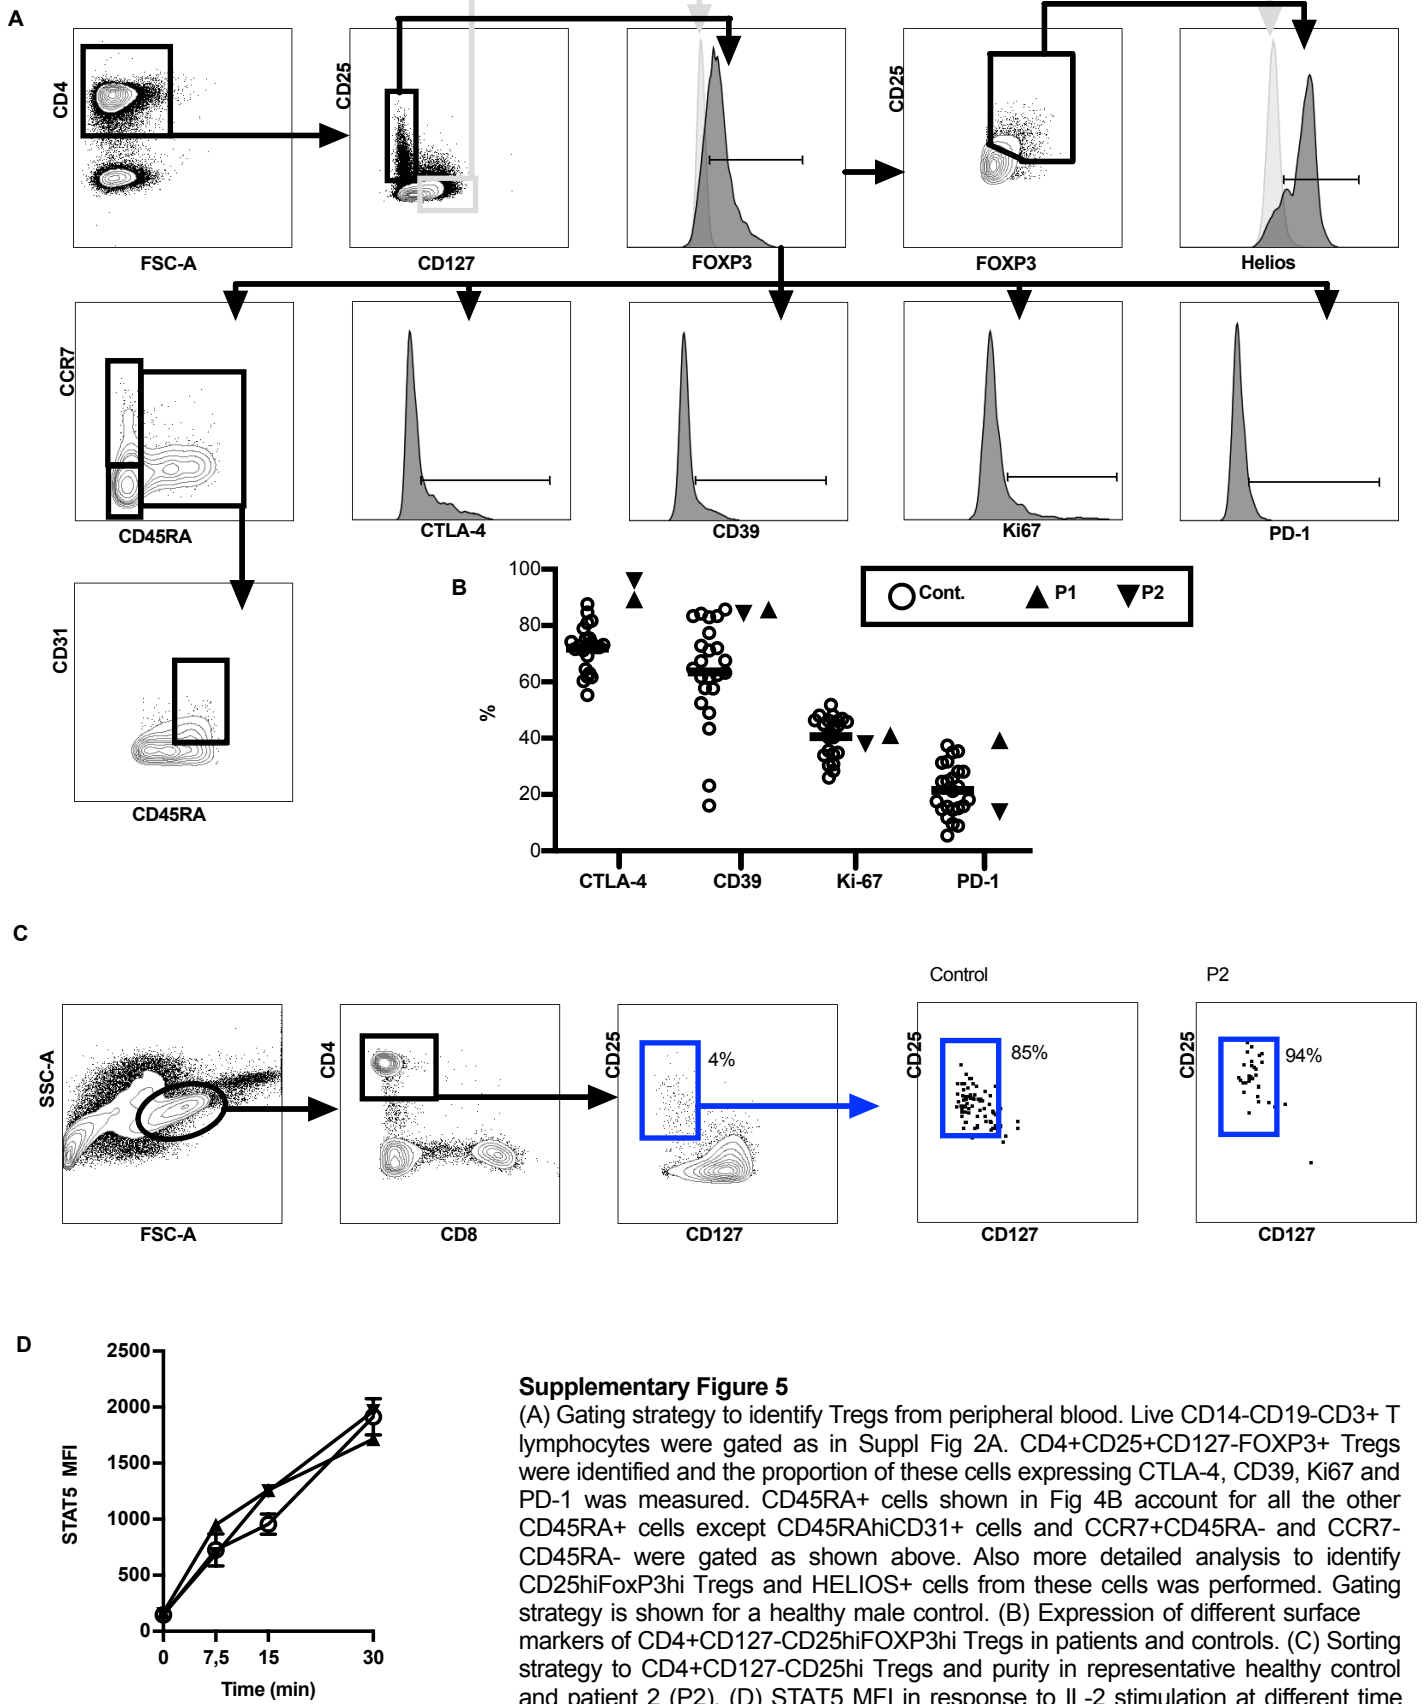

**Supplementary Figure 5**

(A) Gating strategy to identify Tregs from peripheral blood. Live CD14<sup>-</sup>CD19<sup>-</sup>CD3<sup>+</sup> T lymphocytes were gated as in Suppl Fig 2A. CD4<sup>+</sup>CD25<sup>+</sup>CD127<sup>-</sup>FOXP3<sup>+</sup> Tregs were identified and the proportion of these cells expressing CTLA-4, CD39, Ki67 and PD-1 was measured. CD45RA<sup>+</sup> cells shown in Fig 4B account for all the other CD45RA<sup>+</sup> cells except CD45RA<sup>hi</sup>CD31<sup>+</sup> cells and CCR7<sup>+</sup>CD45RA<sup>-</sup> and CCR7<sup>-</sup>CD45RA<sup>-</sup> were gated as shown above. Also more detailed analysis to identify CD25<sup>hi</sup>FOXP3<sup>hi</sup> Tregs and HELIOS<sup>+</sup> cells from these cells was performed. Gating strategy is shown for a healthy male control. (B) Expression of different surface markers of CD4<sup>+</sup>CD127<sup>-</sup>CD25<sup>hi</sup>FOXP3<sup>hi</sup> Tregs in patients and controls. (C) Sorting strategy to CD4<sup>+</sup>CD127<sup>-</sup>CD25<sup>hi</sup> Tregs and purity in representative healthy control and patient 2 (P2). (D) STAT5 MFI in response to IL-2 stimulation at different time points in patients and healthy controls (n=3).

### Suppl Fig 6

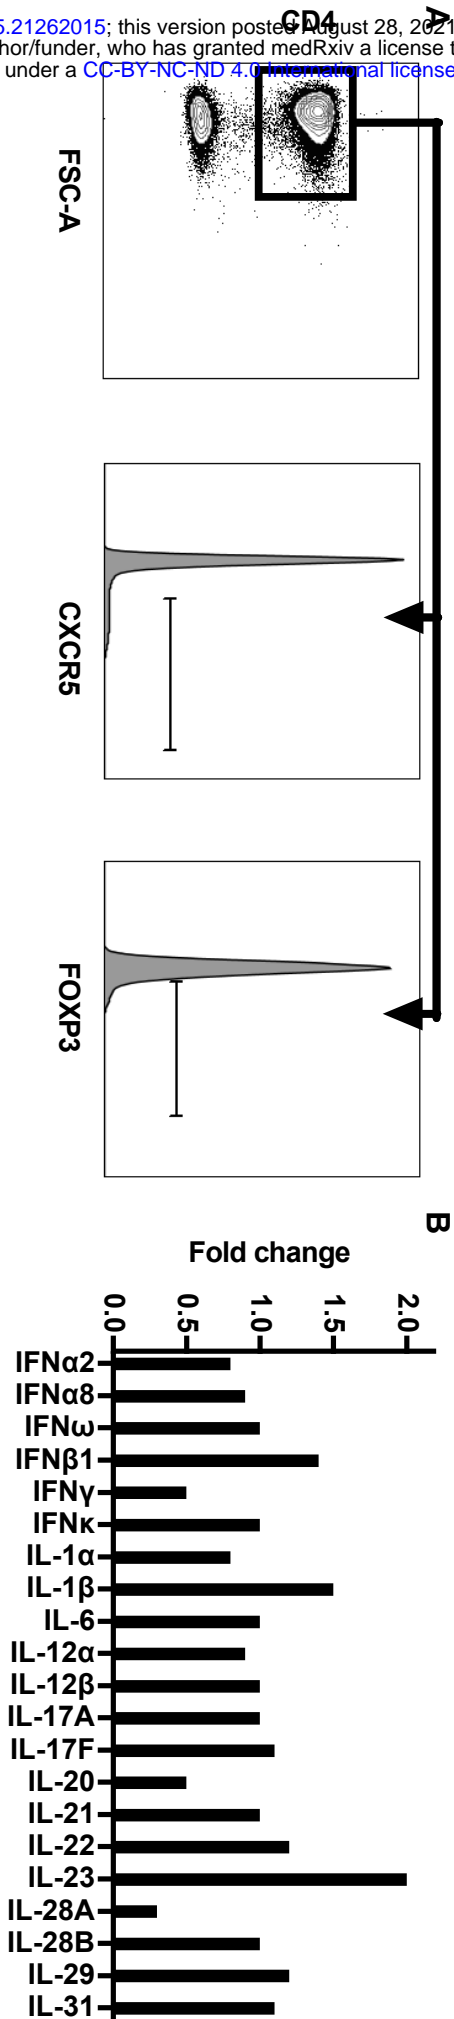

### Supplementary Figure 6

(A) Gating strategy to identify TFH cells from peripheral blood. Live CD14-CD19-CD3+ T lymphocytes were gated as in Suppl Fig 2A. CD4+ cells expressing CXCR5 and FOXP3 were identified from them. Gating strategy is shown for a healthy male control. (B) Auto-antibodies against cytokines in patient 1. Fold change compared to mean of healthy controls (n=5) is shown.

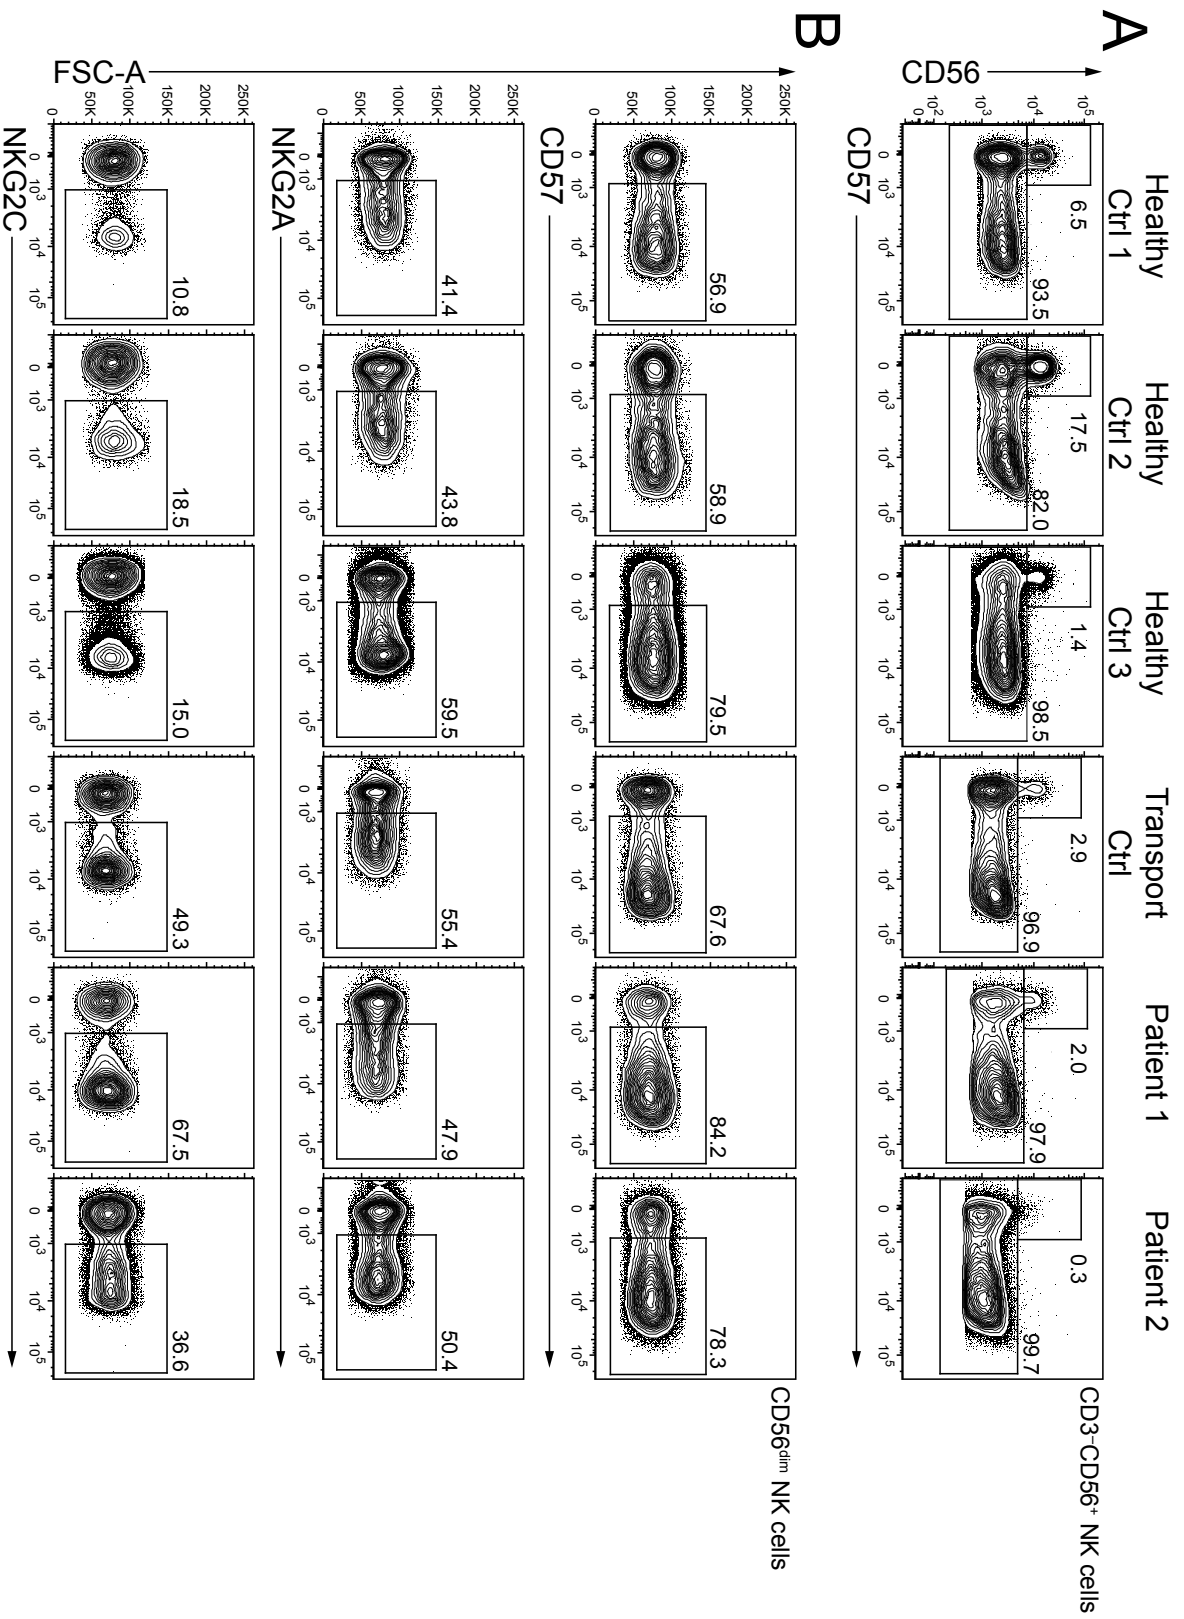

**Supplementary Figure 7**

(A) Proportions of CD56brightCD16- and CD56dimCD16+ NK cells in controls and patients, (B) Proportions of fully mature CD57+, naive NKG2A+, and adaptive-like NKG2C+ CD56dim NK cells in patients and controls.

Suppl Fig 8

medRxiv preprint doi: <https://doi.org/10.1101/2021.08.25.21262015>; this version posted August 28, 2021. The copyright holder for this preprint (which was not certified by peer review) is the author/funder, who has granted medRxiv a license to display the preprint in perpetuity. It is made available under aCC-BY-NC-ND 4.0 International license.

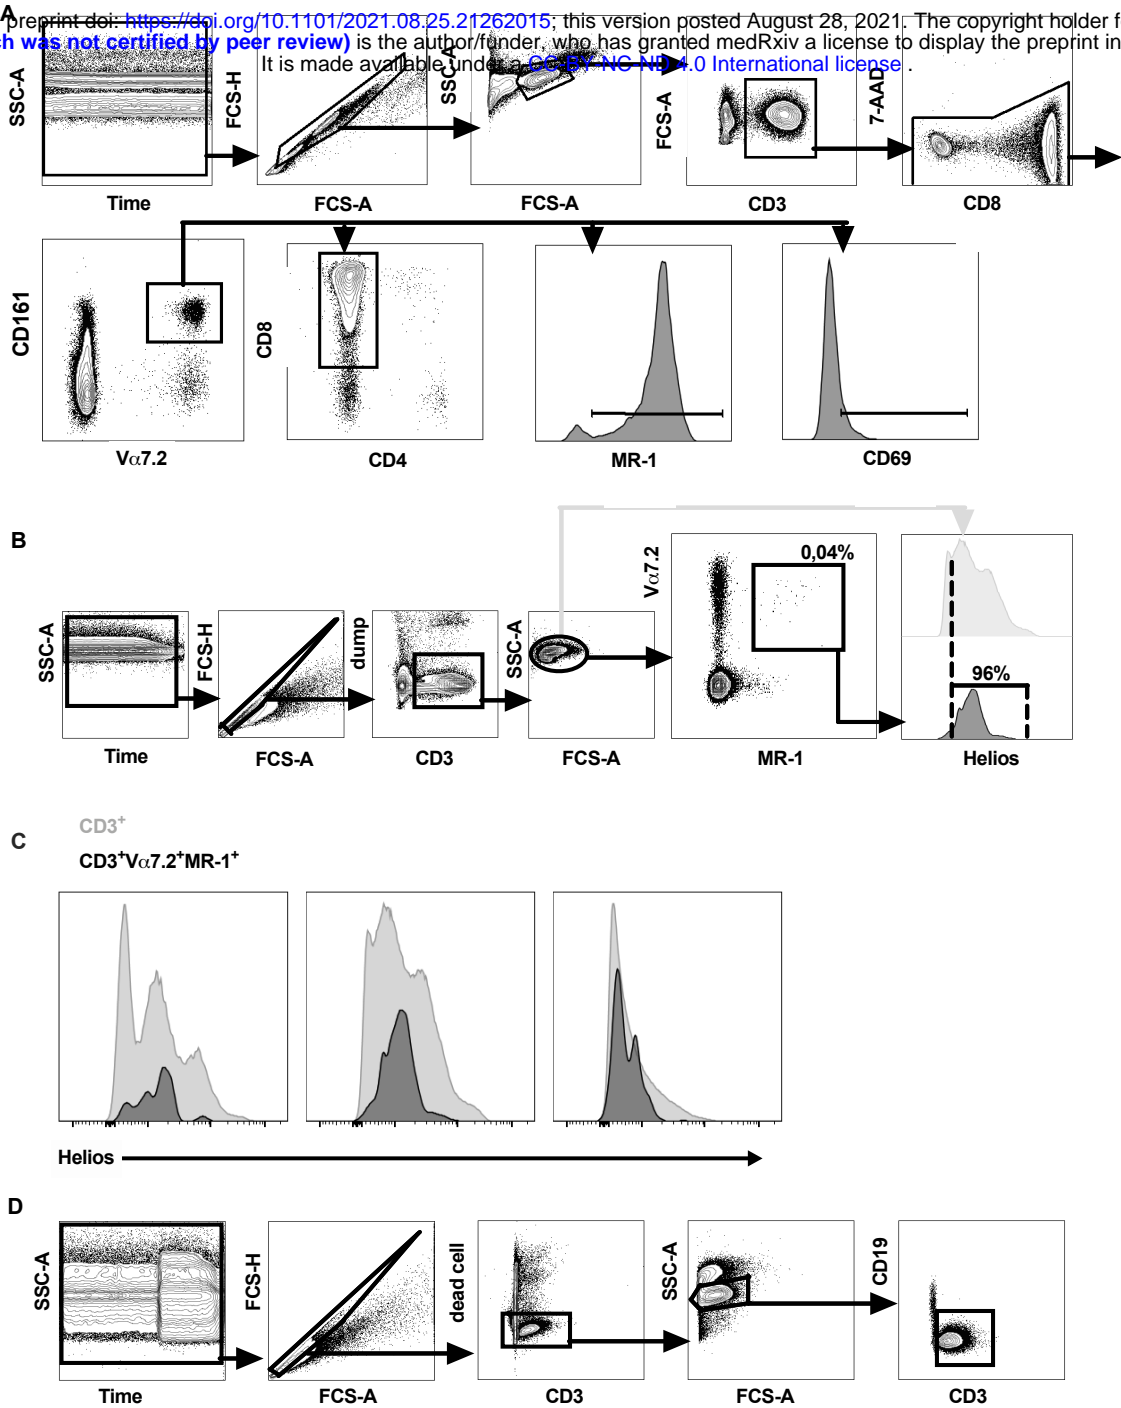

Suppl Fig 8 - MAIT

(A) Abundance and functional characteristics of MAITs were analyzed from freshly isolated PBMCs. From live CD3+Va7.2+CD161+ MAITs expression of MR-1 and CD69 and the proportion of CD8+CD4- cells were evaluated. (B) Developing MAITs were identified from thymus as live CD19-CD14-CD3+Va7.2+MR-1+ thymocytes. Cut-off for HELIOS positive cells was determined from HELIOS expression of all live CD3+ thymocytes (light gray). (C) Histograms showing HELIOS expression in all CD3+ thymocytes (light gray) and CD3+Va7.2+MR-1+ thymocytes (black). (D) From duodenum and colon live CD19-CD3+ were first gated and MAITs identified as Va7.2+CD161hi cells as shown in Fig 6 D&E. Gating strategy is shown with PBMC from a healthy female control (A) with a thymic sample from a male infant (B) and duodenal sample from a healthy female in her 30s (D). Dump = dead cell marked, CD19, CD14.
